# Supplementary material
Source: PubMed Central journal article supplement (PMC6233753)
Supplement: jamainternmed-178-1342-s001.pdf [file jamainternmed-178-1342-s001.pdf]

## Supplementary Online Content

Poon SJ, Schuur JD, Mehrotra A. Trends in Visits to Acute Care Venues for Treatment of Low-Acuity Conditions in the United States From 2008 to 2015. *JAMA Intern Med.* Published online September 04, 2018. doi:10.1001/jamainternmed.2018.3205

eMethods 1. Identifying visits to acute care venues

eTable 1. Proportion of total visits with low-acuity diagnosis codes by venue, 2008 vs 2015

eTable 2. Selected characteristics of US commercial health care plan members less than 65 years of age who sought treatment for low-acuity conditions, 2008 and 2015

eTable 3. Change in visits per 1000 members by venue and by category of low-acuity condition from 2008 to 2015

eFigure 1. Visits to acute care venues for treatment of low-acuity conditions by age, 2008-2015

eFigure 2. Visits to acute care venues for treatment of low-acuity conditions by diagnostic cost group score, 2008-2015

eFigure 3. Visits to acute care venues for all conditions, 2008-2015

eFigure 4. Association between change in utilization of emergency department (ED) vs urgent care centers for the treatment of low-acuity conditions by hospital referral region, 2010-2015

eAppendix A. Tax identification numbers (TINs) and organizational national provider identifiers (NPIs) for urgent care centers, retail clinics, and telemedicine

eAppendix B. ICD-9 and ICD-10 codes for conditions treated in urgent care centers and retail clinics

This supplementary material has been provided by the authors to give readers additional information about their work.

## **eMethods 1. Identifying Visits to Acute Care Venues**

### *Urgent care centers and retail clinics*

In addition to POS codes, we also used NPIs and TINs to identify urgent care centers, retail clinics, and direct-to-consumer telemedicine companies. We employed this additional identification strategy because while the POS code for urgent care was relatively sensitive, identifying 89% of urgent care visits as defined by this combined method, the POS code for retail clinics was very insensitive as it was almost never used, identifying only 1% of retail clinic visits. Two basic types of NPIs exist; individual and organizational. Individual NPIs are used when a claim is submitted by an individual clinician and payment is received directly by that individual. Organizational NPIs are used for corporations and other business entities (i.e. hospitals, urgent care centers, retail clinics) to identify that entity as the payee. Claims submitted using an organizational NPI are typically submitted along with an individual NPI to identify the individual who provided the service. Finally, individuals and businesses who submit claims also have a TIN.

### *Direct-to-consumer telemedicine*

In addition to using NPIs, TINs, and the CPT code 99444 to define telemedicine visits, we also considered including the GT modifier, which allows billing for claims provided “via interactive audio and video telecommunications system.” However, the majority were for mental health-related conditions, so we did not consider use of the GT modifier to be a condition for classifying a visit as a telemedicine visit. As part of our definition of telemedicine visits, we also considered including the CPT code 98969, which are “e-visits” for care provided by a qualified nonphysician healthcare professional. The vast majority of visits with CPT code 98969 in our population were for chronic disease prevention and management, so we did not use this code to define a telemedicine visit. However, some of the telemedicine visits in our study as defined by NPIs and TINs did use CPT code 98969.

### *ED visits*

To test the reliability of the POS codes used to classify a visit as an ED visit (POS code = emergency room or CMS POS code = 23), we determined that only 0.05% of visits with ED-specific procedural codes (CPT codes 99281-5) did not have these POS codes. We identified ED visits using the provider claim and included all ED visits regardless of whether the patient was admitted or not-admitted. Since a single visit was defined by claims that had the same patient identifier, date of service and insurer POS code, we counted only one ED visit per day. To assess the magnitude of multiple ED visits on the same day that would not be accounted for by this method, we examined the frequency of visits that used coding modifier 27, which indicates multiple outpatient hospital encounters on the same day. We found that same-day ED visits comprised only 0.03% of total ED visits.

**eTable 1. Proportion of Total Visits with Low-Acuity Diagnosis Codes by Venue, 2008 vs 2015**

|                           | <b>2008, %</b> | <b>2015, %</b> | <b>Change, %</b> |
|---------------------------|----------------|----------------|------------------|
| ED                        | 38.4           | 28.8           | -9.6             |
| Urgent Care               | 71.5           | 65.4           | -6.1             |
| Retail Clinic             | 61.8           | 57.9           | -3.9             |
| Telemedicine <sup>a</sup> | ---            | 68.7           | ---              |

<sup>a</sup>Data for 2008 excluded due to very few telemedicine visits

**eTable 2. Selected Characteristics of US Commercial Health Care Plan Members Less Than 65 Years of Age Who Sought Treatment for Low-Acuity Conditions, 2008 and 2015**

|                                                   | Emergency Department |                | Urgent Care    |                | Retail Clinic  |                | Telemedicine <sup>a</sup> |
|---------------------------------------------------|----------------------|----------------|----------------|----------------|----------------|----------------|---------------------------|
|                                                   | 2008                 | 2015           | 2008           | 2015           | 2008           | 2015           | 2015                      |
| Age, mean (SD), y                                 | 28.6<br>(18.2)       | 31.0<br>(18.6) | 29.3<br>(17.3) | 31.2<br>(17.3) | 31.3<br>(16.2) | 32.3<br>(16.1) | 36.5 (15.0)               |
| Female, %                                         | 51.7                 | 54.4           | 57.4           | 58.8           | 64.4           | 64.6           | 68.8                      |
| DxCG score <sup>b</sup> , %                       |                      |                |                |                |                |                |                           |
| <0.5                                              | 30.7                 | 25.3           | 45.9           | 43.1           | 52.0           | 47.3           | 42.6                      |
| 0.5-0.99                                          | 23.6                 | 20.6           | 22.9           | 22.2           | 20.9           | 21.6           | 21.5                      |
| 1-3                                               | 27.0                 | 28.0           | 21.7           | 23.4           | 19.7           | 21.9           | 24.9                      |
| >3                                                | 18.7                 | 26.1           | 9.5            | 11.3           | 7.4            | 9.1            | 11.0                      |
| Median household income quartile <sup>c</sup> , % |                      |                |                |                |                |                |                           |
| 1 (low)                                           | 28.6                 | 30.8           | 17.0           | 20.0           | 12.7           | 12.2           | 7.1                       |
| 2                                                 | 25.8                 | 25.9           | 23.8           | 26.8           | 20.3           | 20.5           | 28.6                      |
| 3                                                 | 23.6                 | 22.7           | 28.0           | 28.3           | 30.3           | 30.2           | 21.4                      |
| 4                                                 | 22.0                 | 20.6           | 31.3           | 24.9           | 36.6           | 37.1           | 42.9                      |
| RUCA classification, %                            |                      |                |                |                |                |                |                           |
| Urban                                             | 79.6                 | 81.6           | 87.8           | 87.1           | 93.5           | 91.3           | 76.9                      |
| Suburban                                          | 8.6                  | 8.2            | 7.5            | 7.7            | 5.4            | 6.5            | 11.4                      |
| Large rural                                       | 7.1                  | 6.1            | 3.4            | 3.7            | 0.7            | 1.6            | 7.1                       |
| Small town/rural                                  | 4.7                  | 4.0            | 1.3            | 1.5            | 0.3            | 0.6            | 4.6                       |

Abbreviation: DxCG, Diagnosis-Cost-Group; RUCA, Rural-Urban Commuting Area

<sup>a</sup> Data for 2008 excluded due to very few telemedicine visits

<sup>b</sup> Higher DxCG score indicates higher health risk and higher predicted spending

<sup>c</sup> Quartiles derived from median household income for all enrolled members based on ZIP code from US census data

**eTable 3. Change in Visits per 1000 Members by Venue and by Category of Low-Acuity Condition from 2008 to 2015<sup>a</sup>**

| Venue                           | Low-Acuity Condition Category <sup>b</sup> |             |              |         |             |      |
|---------------------------------|--------------------------------------------|-------------|--------------|---------|-------------|------|
|                                 | Musculoskeletal                            | Respiratory | Ear & Dental | Urinary | Other Viral | Eye  |
| Emergency Department            | -23.6                                      | -4.0        | -2.3         | 0.1     | -1.4        | -0.6 |
| Non-Emergency Department Venues | 10.6                                       | 47.2        | 5.8          | 6.7     | 2.8         | 3.2  |
| Urgent Care                     | 10                                         | 32.5        | 3.8          | 4.9     | 2.0         | 2.2  |
| Retail Clinic                   | 0.4                                        | 10.4        | 1.7          | 1.1     | 0.6         | 0.7  |
| Telemedicine                    | 0.2                                        | 4.3         | 0.3          | 0.7     | 0.2         | 0.3  |
| Total                           | -13.0                                      | 43.2        | 3.5          | 6.8     | 1.4         | 2.6  |

<sup>a</sup> Data are presented as change in visits/1,000 members

<sup>b</sup> Condition categories were Musculoskeletal (Cellulitis or abscess; Contusion; Dislocation/sprain; Fracture; joint and muscle pain, tendonitis, bursitis; Laceration), Respiratory Conditions (Allergic Rhinitis; Bronchitis; Pharyngitis; URI/Sinusitis), Ear & Dental Conditions (Otitis externa and impacted cerumen; Otitis media and eustachian tube diagnoses; Dental), Urinary Conditions (UTI; Other urinary problem), Other Viral Conditions (Influenza; Viral infection), Eye Conditions (Conjunctivitis; Other eye condition). Diagnosis codes used for categorization in **eAppendix B**.

**eFigure 1. Visits to Acute Care Venues for Treatment of Low-Acuity Conditions by Age, 2008-2015**

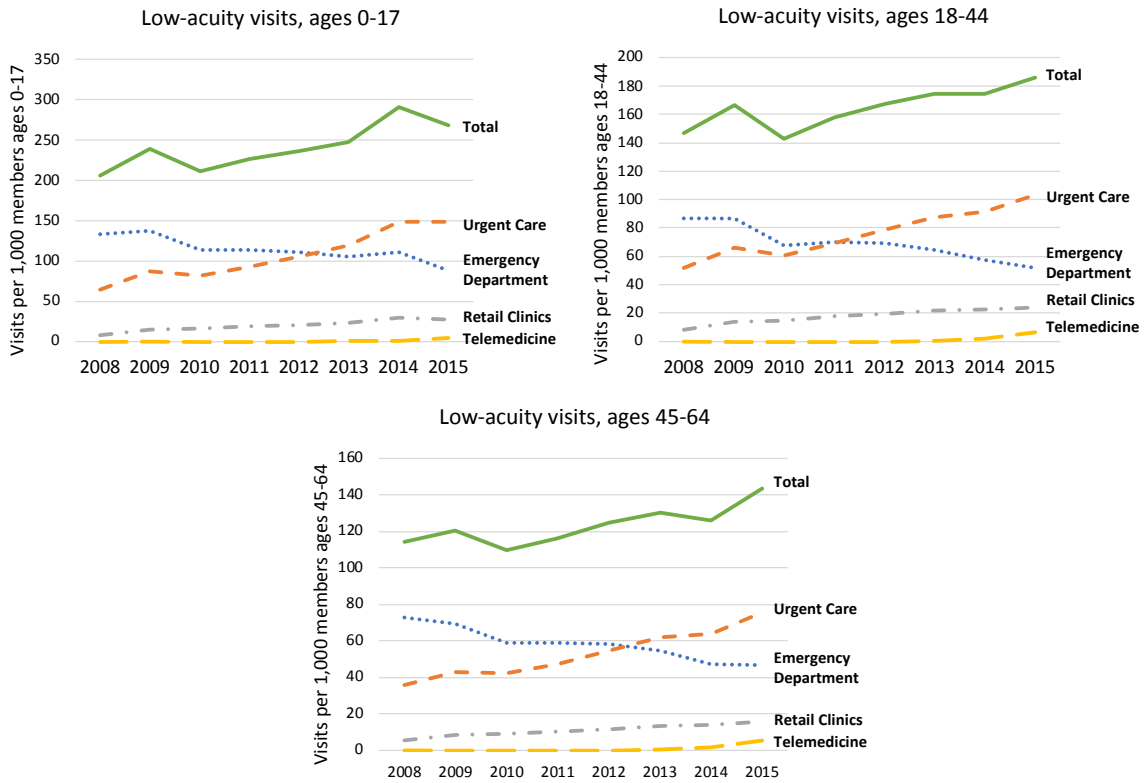

**eFigure 2. Visits to Acute Care Venues for Treatment of Low-Acuity Conditions by Diagnostic Cost Group Score, 2008-2015**

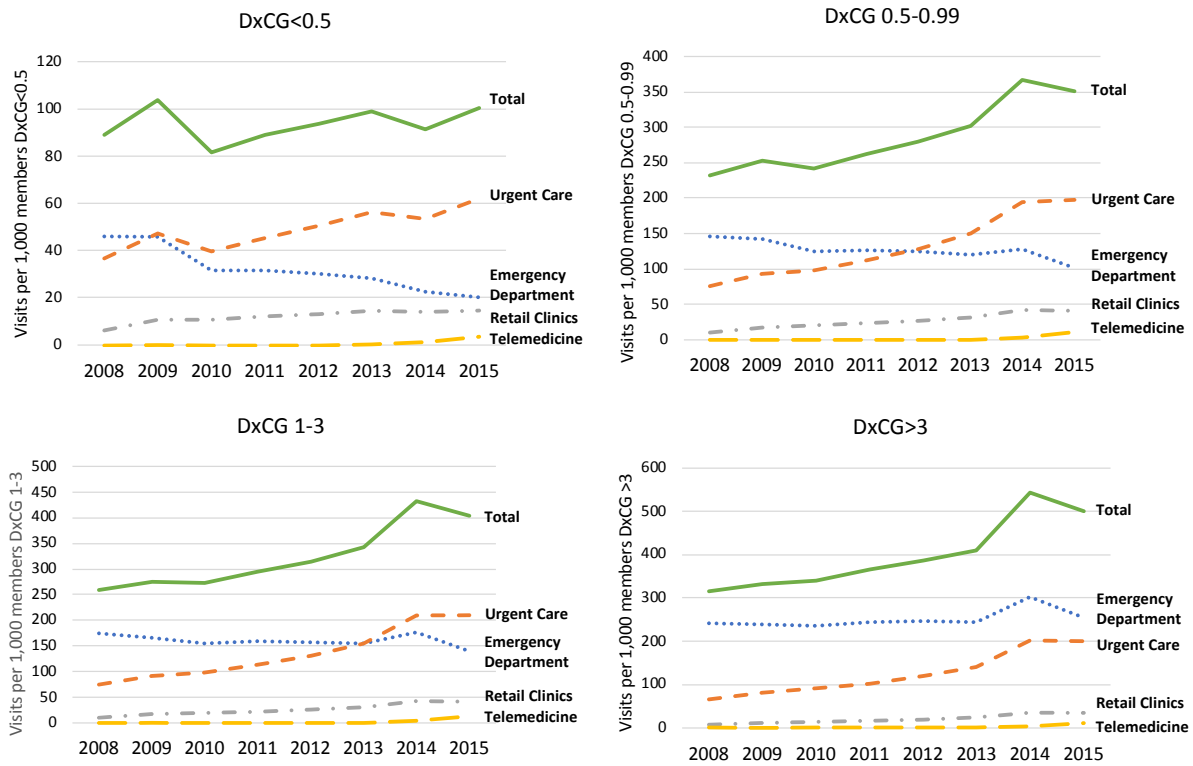

**eFigure 3. Visits to Acute Care Venues for All Conditions, 2008-2015**

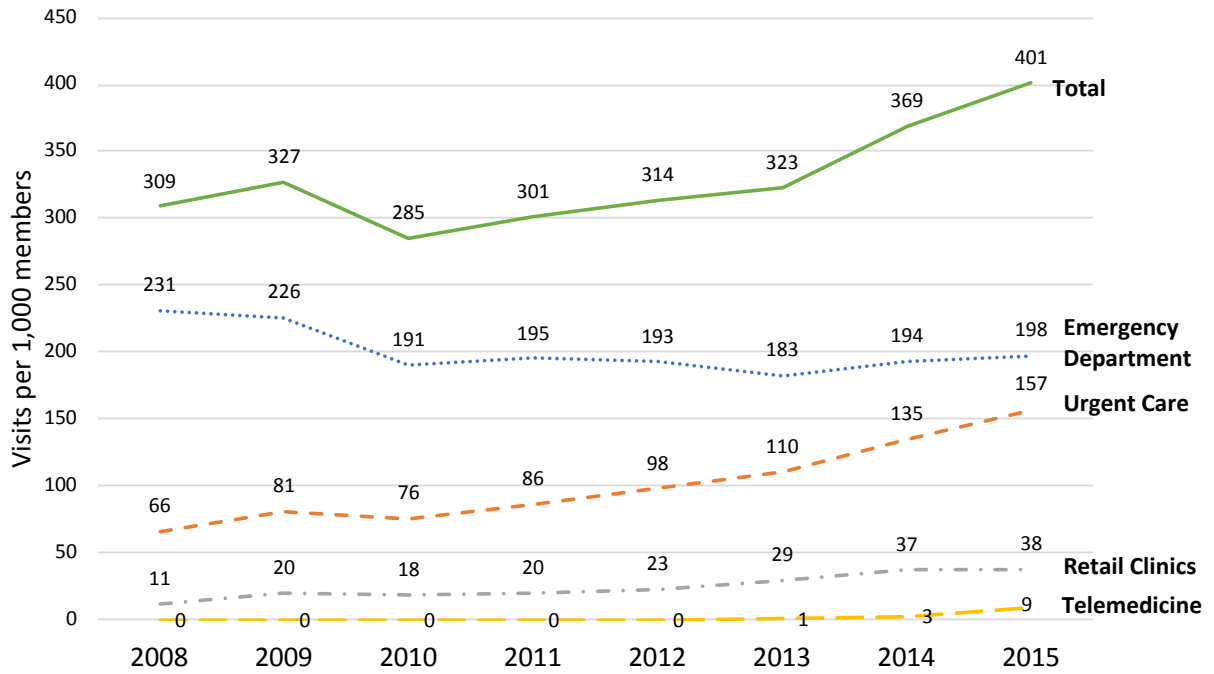



**eFigure 4. Association Between Change in Utilization of Emergency Department (ED) vs Urgent Care Centers for Treatment of Low-Acuity Conditions by Hospital Referral Region, 2010-2015**

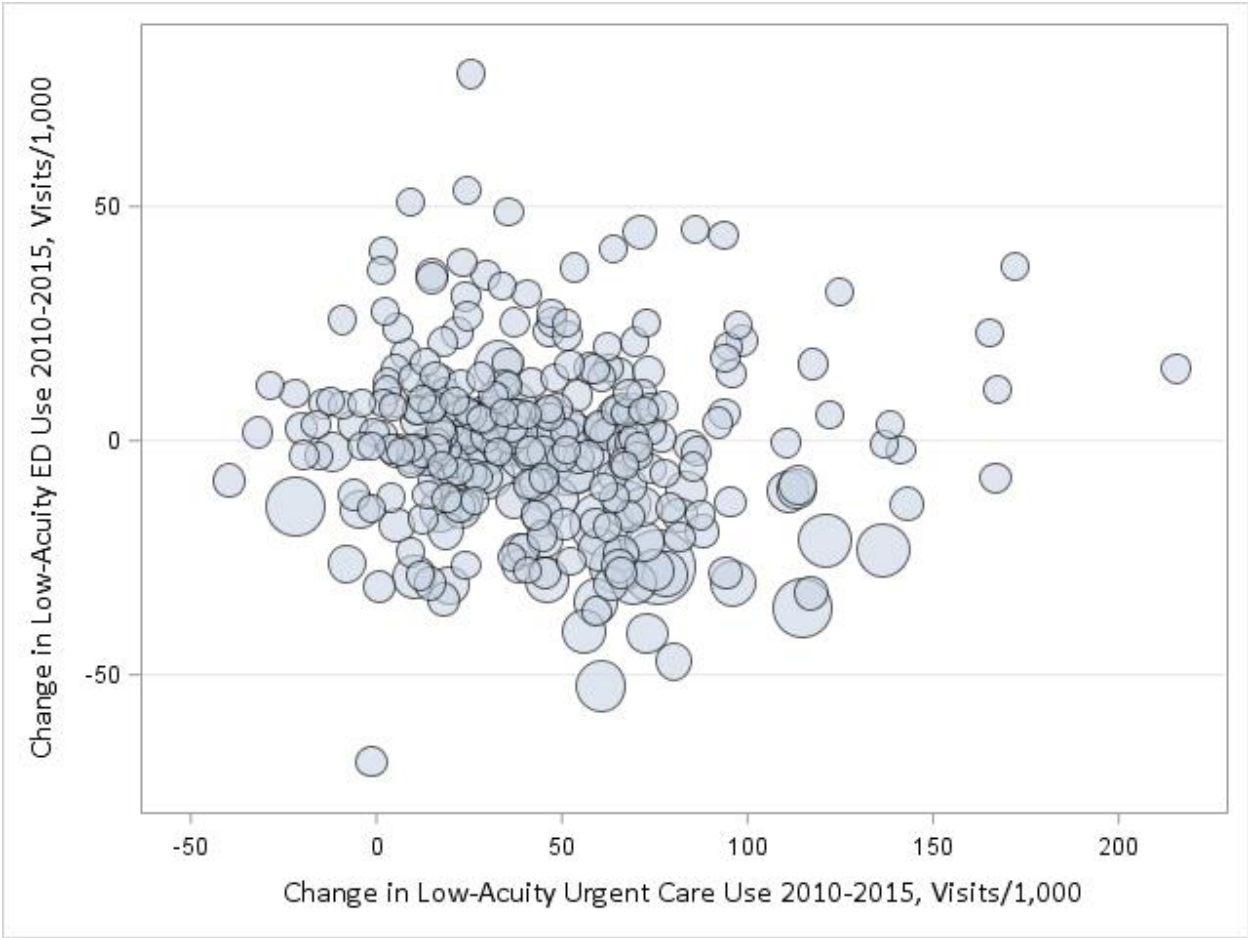

Plot depicts the association between the change in low-acuity Emergency Department (ED) and Urgent Care use by Hospital Referral Region from 2010 to 2015 measured in visits/1,000 members. Dots are larger for regions with greater number of enrollees.

## **eAppendix A. Tax Identification Numbers (TINs) and Organizational National Provider Identifiers (NPIs) for Urgent Care Centers, Retail Clinics, and Telemedicine**

### TINs for urgent care centers

421670203, 320435601, 075201482, 175251054, 752510547, 752510547, 320395105, 742891603, 752384663, 752678147, 042658593, 760546504, 004265859, 043289947, 056131470, 582420844, 158242084, 561204851, 582654983, 320017320, 200173201, 582660956, 562029468, 271968724, 450705207, 320385889, 320399445, 270587283, 320399103, 320428236, 320474495, 630825248, 593108656, 205428139, 203824377, 042955967, 204277891, 550783964, 113646442, 202545363, 263667220, 753056104, 742800963, 742901802, 860998039, 860727095, 742918584, 320379142, 320394421, 541353272, 043730316, 363502461, 363510158, 742231775, 320360878, 010790511, 911579410, 020652328, 043730316, 020652328, 061736435, 200074877, 201902391, 205805198, 205824138, 205997415, 260582791, 260845489, 263239475, 263315640, 263750502, 263858182, 264546400, 270081366, 270572241, 270642524, 271436108, 272208011, 272272976, 272743891, 272973102, 273190192, 273267300, 273742499, 273988055, 274009996, 274412271, 274450928, 274467435, 364615049, 421639127, 452392689, 453123110, 453461101, 453743709, 455388778, 455436856, 461529610, 462391968, 462403175, 462447509, 462500960, 462548275, 462918936, 464348120, 464793937, 470902244, 472608399, 541669672, 541677022, 541905741, 541973284, 570769093, 582380955, 593625966, 742231775, 752473418, 760606470, 820484708, 900795697, 900929572, 954643269, 270851352, 320437361, 113371244, 611675068, 141997293, 202013359, 205277615, 208590757, 223697854, 020592298, 043033510, 640907721, 742904891, 331067457, 200222773, 320355097, 270034858, 810644985, 202309785, 770438269, 010624774, 208870333, 320353535, 320390022, 943137311, 204681846, 850481404, 593433186, 650419077

### NPIs for urgent care centers

1275087694, 1457543324, 1447448923, 1376731851, 1750579439, 1770771255, 1396933974, 1831387315, 1871782490, 1780873307, 1033398201, 1588843734, 1629210307, 1922321314, 1477822476, 1336320738, 1184872764, 1659529238, 1881843225, 1750573622, 1457540452, 1902095961, 1538358510, 1811186851, 1235328287, 1922297985, 1568651578, 1023207065, 1811186869, 1982893988, 1659551695, 1396926523, 1588847073, 1033350665, 1932491685, 1851679419, 1932534609, 1194196345, 1831368489, 1235309204, 1285071241, 1316388002, 1952742645, 1215378906, 1235570920, 1053752741, 1780025478, 1316388614, 1013358472, 1568803922, 1295176642, 1891136180, 1386085660, 1992146286, 1790181410, 1265838981, 1437555133, 1609272301, 1144626847, 1699171397, 1962808667, 1245636943, 1417353111, 1154727857, 1295131324, 1013313147, 1922404052, 1073903712, 1851797989, 1114323243, 1811167596, 1164692844, 1174793855, 1760673768, 1497946495, 1396936191, 1659562262, 1124219597, 1497947576, 1407048408, 1366634347, 1184816191, 1215129234, 1477745495, 1578755393, 1104018787, 1326229725, 1669723474, 1417298100, 1316288004, 1104263086, 1245677954, 1609214196, 1831595933, 1457749749, 1093992281, 1528245719, 1528245727, 1992982185, 1932377298, 1821391707, 1376846253, 1831481589, 1255610457, 1497183636, 1245400225, 1326324039, 1740557362, 1992988190, 1194908392, 1982887188, 1417130618, 1770766974, 1306029517, 1104009315, 1760665962, 1023292943, 1083806822, 1093904872, 1821287525, 1164608790, 1851577498, 1780860320, 1427234004, 1295911451, 1548459464, 1760674790, 1366634172, 1336331925, 1124210711, 1205028883, 1780876375, 1316139918, 1386836963, 1992997571, 1104018795, 1356534242, 1982893681, 1053500751, 1629267349, 1619166337, 1477742179, 1730378431, 1346429388, 1427237049, 1730368366, 1851571608, 1184805574, 1811178213, 1902087307, 1275714677, 1992986392, 1710168117, 1578744702, 1518140045, 1790968923, 1578746707, 1982887139, 1922281724, 1558544353, 1568646487, 1740464668, 1235313156, 1780868554, 1780868547, 1003090879, 1801071196, 1376728667, 1477730356, 1174700058, 1427235308, 1861679722, 1689851552, 1205013182, 1962689836, 1225215429, 1962680454, 1902057086, 1811148992, 1770719296, 1164755708, 1831415983,

1780900407, 1386962587, 1790085355, 1306147111, 1952602765, 1689975492, 1518269620,  
1780986596, 1457655540, 1881991115, 1417254749, 1689964736, 1659661783, 1447543715,  
1477847093, 1568757250, 1750679262, 1710275268, 1043598600, 1922389253, 1669753992,  
1578848677, 1760769616, 1568739191, 1972872976, 1053680876, 1306116496, 1518238039,  
1982975504, 1578820403, 1376800201, 1457618381, 1700143641, 1013274943, 1477810307,  
1821355751, 1326308180, 1316293319, 1164778163, 1750637765, 1245586247, 1144576141,  
1922354935, 1891043048, 1669721999, 1336499482, 1225380405, 1568706455, 1962748137,  
1275879157, 1790022259, 1609113166, 1477892768, 1649519836, 1770822710, 1174865190,  
1487996054, 1174865695, 1205178563, 1548503436, 1285078311, 1487090197, 1386081867,  
1437597044, 1689012197, 1275973240, 1033559034, 1831527001, 1457789620, 1497185771,  
1033540117, 1396166229, 1033530993, 1104241256, 1669890695, 1194122499, 1003202706,  
1316325509, 1548613797, 1609320381, 1356897987, 1326222191, 1013194455, 1417131335,  
1720262645, 1972787737, 1508044587, 1619169489, 1386833291, 1790974608, 1730378605,  
1821278755, 1376723718, 1083914220, 1164707279, 1346439023, 1942492590, 1316136294,  
1770772667, 1528257425, 1871782771, 1720277593, 1295924173, 1194914085, 1710176482,  
1437348141, 1992994644, 1376732040, 1043409717, 1104015783, 1972792554, 1407045081,  
1700075439, 1255520995, 1114116852, 1508055278, 1295924967, 1386833010, 1922297639,  
1497944011, 1417136979, 1619156106, 1730360124, 1922289156, 1982887386, 1063695864,  
1962685768, 1174750533, 1053500629, 1891979712, 1871770784, 1275851073, 1548588346,  
1801114608, 1144566027, 1326237900, 1639352768, 1902089493, 1144495243, 1386885770,  
1306161666, 1467712232, 1174865984, 1033374764, 1356588339, 1558651687, 1710279583,  
1316101579, 1194974261, 1871757351, 1306965553, 1457470668, 1386763589, 1780703058,  
1518086792, 1174642326, 1346369626, 1760630867, 1942458047, 1013166057, 1205085206,  
1376734616, 1699939108, 1699930313, 1043448087, 1316988041, 1073522538, 1285837955,  
1295926525, 1912161175, 1811151079, 1770748618, 1689839508, 1326203241, 1023273935,  
1528223336, 1699930545, 1487819330, 1942465877, 1669637369, 1992960769, 1336304765,  
1740445196, 1528224631, 1437315546, 1033375753, 1972769685, 1588820211, 1922264639,  
1477719185, 1073779781, 1407012123, 1770749491, 1225294945, 1750547485, 1730345034,  
1326204629, 1437315728, 1255597555, 1184880478, 1992961288, 1710143003, 1629234919,  
1083870372, 1336305630, 1982860284, 1518123819, 1497903595, 1215185319, 1093963100,  
1356599468, 1366690471, 1801044912, 1851549760, 1841448750, 1013165927, 1922256833,  
1831347749, 1740438654, 1033367941, 1396993200, 1932357845, 1750539664, 1669620571,  
1659529568, 1629226493, 1033368477, 1134378177, 1346499415, 1073762142, 1790934867,  
1154570232, 1225287303, 1861641946, 1023267101, 1548419583, 1548419591, 1366691313,  
1447409495, 1356590301, 1265681217, 1366691347, 1518116599, 1326297490, 1114176195,  
1003065038, 1912156944, 1821247859, 1043469083, 1952550998, 1831348861, 1740439777,  
1659520682, 1386893311, 1154570190, 1063661007, 1972752913, 1104075142, 1922257963,  
1588813521, 1306095344, 1215186259, 1851540892, 1396994331, 1205085248, 1114176153,  
1669621603, 1487803425, 1629227673, 1528217601, 1194974139, 1912156951, 1821247867,  
1730338773, 1649429689, 1275782229, 1710136759, 1902055072, 1801045976, 1710136882,  
1962651034, 1962651950, 1871742866, 1942459979, 1083863021, 1891944831, 1700035748,  
1619126653, 1528217569, 1144479189, 1053560094, 1306095476, 1215186382, 1982853925,  
1427207463, 1881843829, 1295984235, 1457500498, 1306095484, 1215186390, 1679722755,  
1861641938, 1679722748, 1275782203, 1366691438, 1982853057, 1609025774, 1154570224,  
1972752046, 1881843951, 1225287261, 1326297300, 1376792309, 1285883215, 1093964025,  
1902055932, 1548419575, 1184873119, 1992954929, 1801045836, 1447409479, 1174772107,  
1083863013, 1992954937, 1801045844, 1457500407, 1073762159, 1609025782, 1245489327,  
1114176294, 1447409511, 1356590426, 1083863153, 1760631709, 1376792317, 1720237761,  
1194974113, 1295984227, 1104075134, 1013166040, 1861641805, 1083863963, 1215187828,  
1598915779, 1144470329, 1043460223, 1336390640, 1427200948, 1508018029, 1235381773,  
1902058449, 1457503997, 1366694804, 1265684708, 1437301975, 1518119056, 1972755411,  
1215189758, 1528210069, 1427200963, 1154573699, 1477705911, 1679725113, 1447402987,  
1356593891, 1619129152, 1265684781, 1982856407, 1902058431, 1144472689, 1407008949,  
1316199854, 1225280761, 1124270665, 1033361571, 1841442381, 1750533295, 1104078641,  
1568614006, 1912159450, 1821240367, 1245482728, 1861644346, 1124270608, 1942452420,  
1942452354, 1013169424, 1316199722, 1942452412, 1851543326, 1487806956, 1194977678,

1639321110, 1790937274, 1033361514, 1760634240, 1396997870, 1285886754, 1396997706,  
1043462518, 1821240391, 1649422114, 1417109992, 1780836262, 1598917072, 1407008980,  
1427200849, 1164674636, 1982856456, 1598917064, 1952553422, 1497907968, 1306098876,  
1649422122, 1366694846, 1275785750, 1992957476, 1770735250, 1114179694, 1669624144,  
1578715058, 1497907802, 1902058316, 1427200856, 1932351343, 1720230139, 1629220033,  
1225280647, 1235381708, 1578715041, 1295987766, 1902058480, 1356593834, 1174775654,  
1083866560, 1891947370, 1871745299, 1700038270, 1346492816, 1083866404, 1205088788,  
1487806964, 1912159336, 1497907794, 1033361332, 1306098603, 1871748574, 1083850366,  
1174769459, 1144466202, 1578700258, 1306085550, 1316189145, 1407098247, 1861634602,  
1639311301, 1366684730, 1073778825, 1871758599, 1881766202, 1215063292, 1629264288,  
1437345089, 1992750731, 1710176524, 1700215050, 1609079375, 1255597977, 1891951513,  
1669638300, 1487810115, 1396901690, 1881919777, 1326365388, 1407167729, 1053623355,  
1083628333, 1770655649, 1598856338, 1588755326, 1023098845, 1619361961, 1407836208,  
1649514258, 1316927338, 1225583057, 1295105344, 1003286154, 1730559899, 1992175053,  
1093186421, 1073986717, 1033664396, 1184179301, 1902351133, 1770038911, 1083169221,  
1992250971, 1043765027, 1164977963, 1336694140, 1770038580, 1982159729, 1447705298,  
1083169833, 1790230548, 1063967818, 1659826402, 1184179863, 1528513207, 1245785922,  
1639624299, 1467907931, 1043766520, 1205382785, 1386190866, 1265988745, 1619423100,  
1669928156, 1366998791, 1649726084, 1790231157, 1770039133, 1932655396, 1477009835,  
1821544289, 1902352362, 1467908392, 1083160923, 1417403353, 1457807307, 1073069928,  
1700211232, 1104127034, 1902215189, 1073868600, 1245514355, 1003152984, 1558753574,  
1043607294, 1497159560, 1417079229, 1992923262, 1124379409, 1841525235, 1568696227,  
1902124647, 1477972263, 1144528514, 1316245780, 1326336702, 1447558002, 1669701306,  
1164882031, 1215379789, 1114293917, 1952715419, 1962895649, 1316272685, 1407106982,  
1639575590, 1871865709, 1720458383, 1740672989, 1225381148, 1316249394, 1417263997,  
1477845279, 1407162076, 1235443854, 1861705857, 1518229426, 1740590157, 1417293465,  
1104107614, 1326356031, 1518274927, 1063714236, 1992022370, 1902168461, 1780934125,  
1770983199, 1376853663, 1184928368, 1790071355, 1740626621, 1871889543, 1811210735,  
1770857278, 1164797957, 1770869315, 1629466917, 1902188196, 1417205105, 1598195968,  
1831435924, 1366850059, 1437546363, 1336495498, 1639448251, 1760745558, 1609127422,  
1942602172, 1992078000, 1386952034, 1316225147, 1558788620, 1396058137, 1386925360,  
1942519335, 1851784896, 1831416346, 1316369895, 1760750541, 1659626414, 1386941912,  
1144598293, 1902128507, 1124306923, 1174804918, 1710283650, 1275776148, 1770885808,  
1336491075, 1922383959, 1205268208, 1457754301, 1790166106, 1104285824, 1518326248,  
1649647249, 1720008311, 1669429080, 1992724124, 1598771990, 1407862808, 1316953714,  
1275549685, 1184630592, 1992711303, 1083620496, 1578579983, 1487660890, 1669488060,  
1578579975, 1699781005, 1831207604, 1336242908, 1497858948, 1538262985, 1912006735,  
1629470356, 1891701207, 1912246406, 1629436431, 1043526528, 1245575950, 1346608825,  
1720459134, 1861645798, 1255578712, 1548408693, 1720311392, 1295069037, 1982910089,  
1013224443, 1841508785, 1891088779, 1073891792, 1326315193, 1629346960, 1730443524,  
1316376296, 1912318361, 1295147106, 1780096750, 1982016820, 1780096628, 1568874543,  
1730587338, 1346605839, 1528404613, 1508292657, 1043667660, 1598132490, 1063881092,  
1427416908, 1871941815, 1316398118, 1801845011, 1417906611, 1023067220, 1225087430,  
1821047952, 1780633834, 1215986344, 1679522163, 1902058498, 1275848426, 1487696969,  
1811047285, 1275787434, 1336386937, 1982841581, 1265670715, 1861718306, 1831554211,  
1275088676, 1356743025, 1548682578, 1669830881, 1760804793, 1013375237, 1306117205,  
1023455052, 1821439761, 1669805016, 1043643489, 1609209048, 1497188841, 1184057523,  
1326472986, 1013341676, 1104251958, 1548698012, 1528476751, 1659767770, 1891155982,  
1467801852, 1205183894, 1568710580, 1205171501, 1992148746, 1639507197, 1376964056,  
1578984357, 1104247881, 1750781654, 1396133393, 1750779658, 1790174878, 1184010100,  
1154718567, 1659769529, 1306216932, 1407227739, 1154784882, 1922488014, 1235508516,  
1083161640, 1033574256, 1326408428, 1245693977, 1427405968, 1326433277, 1639565559,  
1710340443, 1790132231, 1417400235, 1457808016, 1205849379, 1003971417, 1730373879,  
1588025332, 1942662051, 1366544728, 1073889630, 1245506807, 1366718926, 1083970867,  
1609069970, 1750440475, 1174716443, 1477716108, 1609114578, 1831430404, 1164763744,  
1003157322, 1932542925, 1215372586, 1770875494, 1407123615, 1376884957, 1235138280,

1306201215, 1538395959, 1912133315, 1326351461, 1760786131, 1053602870, 1962772111,  
1033489281, 1740550995, 1649540899, 1457622839, 1700159027, 1033550975, 1811338742,  
1659784056, 1649668047, 1962885582, 1902281686, 1780016774, 1629434253, 1891052668,  
1912160920, 1629379607, 1801173653, 1639436256, 1003164211, 1891030334, 1902147564,  
1689954109, 1316227838, 1235227422, 1073798153, 1548290240, 1053514968, 1609875277,  
1487058830, 1710328653, 1427490432, 1326476003, 1164707980, 1073857363, 1740648492,  
1891142337, 1528415064, 1922459734, 1366820094, 1376941591, 1437536083, 1134506488,  
1184095515, 1285093393, 1548611007, 1013389485, 1649694407, 1598185373, 1689082257,  
1336548734, 1790161396, 1669839494, 1164879607, 1336592856, 1104279629, 1457704975,  
1801040092, 1164421517, 1811141005, 1902056476, 1033517248, 1255719472, 1710371448,  
1982839031, 1841426244, 1386977973, 1417281098, 1417279670, 1609192012, 1891011979,  
1245556398, 1013223171, 1710295639, 1235447202, 1700188349, 1548562184, 1700188257,  
1487950986, 1245536416, 1780980953, 1295025179, 1467744375, 1225325178, 1801175492,  
1063791663, 1396025813, 1558642991, 1932480852, 1063793685, 1639441868, 1386916518,  
1134492788, 1518230168, 1497028054, 1467725010, 1043583602, 1073886636, 1356614895,  
1326311861, 1528331071, 1689948077, 1346514734, 1942574348, 1023375797, 1730447046,  
1770830580, 1750638565, 1720336829, 1063761310, 1164766440, 1306187976, 1083017404,  
1629466628, 1699163576, 1801243340, 1518252964, 1689931446, 1124280912, 1215219878,  
1821372624, 1720356405, 1992076889, 1437420320, 1861763757, 1497020747, 1790042562,  
1568729325, 1841557519, 1790049625, 1417211343, 1902153711, 1699019984, 1386989689,  
1710338520, 1417402801, 1124573514, 1215363429, 1518256080, 1225327547, 1124318043,  
1346411600, 1740448430, 1972585099, 1437323722, 1255692182, 1194080218, 1649529058,  
1265770135, 1992060016, 1184812000, 1053375659, 1134185671, 1265496863, 1881650471,  
1144251976, 1770549214, 1861458309, 1043276587, 1629034210, 1932383007, 1144279670,  
1124050539, 1932133139, 1366476566, 1265466460, 1619901824, 1790719904, 1144254376,  
1952335184, 1295757789, 1902062441, 1043371826, 1972822450, 1700105244, 1609195148,  
1770802068, 1689993974, 1215256508, 1306165691, 1972822013, 1144549288, 1003135062,  
1457670481, 1396065322, 1205156239, 1295055226, 1891014825, 1427378397, 1144540014,  
1780904656, 1891015764, 1255651121, 1790005668, 1245550110, 1679893309, 1740322858,  
1669858924, 1245694082, 1619300118, 1326000597, 1114983608, 1043253883, 1952367492,  
1508808320, 1154472967, 1922289412, 1487838652, 1972757474, 1396984514, 1093104838,  
1760702997, 1942691100, 1073661690, 1336491968, 1225331903, 1154624831, 1821391491,  
1346545209, 1750708392, 1962786269, 1770867087, 1366716557, 1649530197, 1962580118,  
1972762839, 1235398199, 1194052514, 1477877868, 1649554940, 1104196302, 1235409012,  
1619249109, 1851663934, 1043582117, 1477818730, 1710239082, 1558607960, 1255677415,  
1356687081, 1609115997, 1063859825, 1750728523, 1316384175, 1891132650, 1376981092,  
1538595871, 1972929081, 1710303813, 1275959389, 1669899209, 1841617487, 1932526571,  
1679990212, 1740526144, 1336554153, 1114329471, 1376947754, 1417321381, 1003280033,  
1083989883, 1760727945, 1073858122, 1972848950, 1710222708, 1235474214, 1821333816,  
1063757045, 1053656025, 1174868152, 1083959068, 1114263019, 1407193816, 1336486646,  
1689911091, 1578800884, 1790022051, 1437496791, 1194062406, 1982941126, 1851638001,  
1528305349, 1750628400, 1376880096, 1386982205, 1104164029, 1477891398, 1588902498,  
1487992301, 1295073112, 1205174141, 1205177573, 1235571241, 1861825861, 1316371115,  
1659707735, 1194152744, 1639507494, 1790115384, 1184093031, 1164891016, 1669841516,  
1659740504, 1013386978, 1386013241, 1942679519, 1922478205, 1033589072, 1740650456,  
1659741361, 1295107514, 1578937504, 1952775108, 1154695344, 1407114176, 1710245485,  
1598028987, 1861755266, 1801143847, 1962747162, 1982949947, 1063729226, 1861765638,  
1790979136, 1942360961, 1831415868, 1114075124, 1023166030, 1750439766, 1669520672,  
1578611588, 1487702494, 1295883205, 1104974112, 1013065028, 1922156934, 1831247840,  
1740338755, 1942358957, 1932257946, 1841348851, 1184772824, 1144378704, 1053469619,  
1093850232, 1558493288, 1750769220, 1932345238, 1659659555, 1922381748, 1689937732,  
1639532393, 1972939163, 1952732851, 1003203613, 1023487873, 1609227230, 1306940580,  
1154425338, 1811091077, 1720182983, 1548364193, 1902080005, 1780849406, 1205087517,  
1952552267, 1679724983, 1093034811, 1215229901, 1366735516, 1366704546, 1265866503,  
1205265055, 1861884298, 1528435492, 1285093773, 1881049393, 1962423632, 1922251701,  
1245484377, 1336538701, 1982733564, 1609280999, 1013390426, 1548643950, 1679940779,

1043689458, 1134598709, 1174994701, 1679712517, 1720440464, 1528206612, 1386033264,  
1851544035, 1356633523, 1699055954, 1528325966, 1386999142, 1053665067, 1881934644,  
1902246853, 1407277890, 1487075826, 1033531264, 1093137044, 1932511870, 1770984270,  
1508210451, 1891240099, 1194039560, 1881997435, 1306142021, 1659677383, 1578837233,  
1457613374, 1568712677, 1023354420, 1104167238, 1770904609, 1225459159, 1689084204,  
1285034470, 1124488192, 1346690864, 1851690903, 1386748937, 1861791766, 1487945846,  
1588935969, 1386988632, 1902147374, 1649511791, 1225469646, 1558776682, 1023482510,  
1134583008, 1689603748, 1649389693, 1548364771, 1033213103, 1881798049, 1902900558,  
1811091465, 1720182371, 1639273287, 1659475200, 1568566115, 1477657021, 1922102573,  
1831293489, 1740384395, 1124279435, 1437476363, 1972822344, 1073827440, 1558661926,  
1104194398, 1730423856, 1568891315, 1871908145, 1255703419, 1588018881, 1003945676,  
1558773358, 1447499512, 1316268758, 1730535261, 1336384494, 1194040766, 1295051308,  
1366768475, 1548560782, 1407908403, 1053654947, 1720320997, 1528301223, 1326481557,  
1407299639, 1871836148, 1417390642, 1346582517, 1437491602, 1699018051, 1699118828,  
1508209735, 1568703783, 1770829053, 1407195795, 1083043566, 1407893100, 1518913409,  
1851344378, 1831423482, 1609822592, 1528362381, 1447448733, 1881097772, 1770919797,  
1558414631, 1043409147, 1477690154, 1255670089, 1134232184, 1730434283, 1770822751,  
1205175213, 1083953079, 1073852067, 1336488329, 1952640963, 1356680334, 1699014696,  
1407195407, 1053650069, 1033458047, 1013256023, 1689913675, 1194064196, 1598004509,  
1588903595, 1295074276, 1568701563, 1811236896, 1003155037, 1205175171, 1922347897,  
1326387218, 1265771125, 1952640807, 1013256973, 1467791327, 1184963035, 1851630719,  
1801135785, 1528307550, 1821337775, 1184963118, 1780923672, 1417296393, 1427397306,  
1649519513, 1720327687, 1124367016, 1578802526, 1437498318, 1336488360, 1154660009,  
1790024685, 1972842862, 1689913576, 1780923631, 1689913436, 1346589173, 1437498268,  
1033581384, 1639542202, 1205292885, 1568560571, 1366499048, 1619984630, 1083621007,  
1700893724, 1154508265, 1528307576, 1295184208, 1023392800, 1700803632, 1144504663,  
1104943844, 1952572430, 1821002510, 1831585108, 1295947323, 1952796112, 1528046323,  
1538499140, 1205814118, 1649665902, 1114141090, 1063808301, 1699160952, 1407193725,  
1831144351, 1376908178, 1649635442, 1003271800, 1831554633, 1922463728, 1689039471,  
1417312208, 1487019287, 1669837464, 1578928370, 1851756654, 1114382918, 1285099085,  
1053784660, 1578937868, 1053608547, 1770713117, 1104988435, 1881930493, 1609802719,  
1174913842, 1508151523, 1033195474, 1265790588, 1740575760, 1285929208, 1144515172,  
1790070720, 1306105663, 1417390519, 1538501291, 1033549514, 1962832543, 1922438415,  
1871923359, 1124458617, 1154747996, 1467869388, 1760890404, 1487029468, 1821463803,  
1285009266, 1013250471, 1326480062, 1750713905, 1396175881, 1912385162, 1356734032,  
1346547676, 1568858686, 1639547375, 1417325986, 1316303340, 1528518776, 1992256622,  
1215488952, 1699226043, 1265983308, 1710262266, 1801277629, 1124199252, 1073673034,  
1629226592, 1609195254, 1730491945, 1790080430, 1982903506, 1205111846, 1609148733,  
1932468089, 1790048569, 1922344712, 1730425414, 1720327372, 1487993564, 1306284757,  
1356789572, 1295175503, 1588005284, 1013342104, 1972924835, 1992126247, 1093131252,  
1871919811, 1790101731, 1366869679, 1386055648, 1801207998, 1255742342, 1538570627,  
1942611520, 1548671126, 1477966083, 1760899678, 1518374438, 1487061206, 1033512611,  
1881088292, 1831586437, 1609263219, 1861870206, 1699150789, 1811364201, 1548637937,  
1437522331, 1588020598, 1861858896, 1962868372, 1235686437, 1285182873, 1922556513,  
1043761786, 1740733229, 1053775288, 1548718141, 1376984633, 1851633390, 1487997144,  
1427472265, 1518380914, 1053666206, 1396090528, 1205979952, 1073935003, 1447695713,  
1164840609, 1932521267, 1932590676, 1073995700, 1205219441, 1801261433, 1871980888,  
1225425234, 1437527975, 1013468461, 1760722334, 1528406352, 1366882276, 1174964464,  
1922434000, 1558790527, 1447676549, 1306257993, 1013321272, 1265848956, 1245632249,  
1093111742, 1457741704, 1366828576, 1649643693, 1720451776, 1902270770, 1588115935,  
1649612680, 1174955520, 1689002982, 1710303136, 1639581689, 1538565320, 1396137568,  
1497001200, 1780926220, 1144665126, 1962848499, 1821428103, 1477977593, 1114342219,  
1093158990, 1447660816, 1982098406, 1194119412, 1447644521, 1073938817, 1457802019,  
1003172628, 1457716706, 1053628867, 1134452865, 1154791812, 1518315902, 1396065686,  
1942318308, 1992987549, 1710244587, 1780931501, 1679936835, 1043685704, 1528432036,  
1669827424, 1780130013, 1821548496, 1073063657, 1730630195, 1215302971, 1811286354,

1780958470, 1225303100, 1356608244, 1134486020, 1659630010, 1205195666, 1750640629, 1508113416, 1558606079, 1467797993, 1154667301, 1518203769, 1861730590, 1922410356, 1376941849, 1861881831, 1962893313, 1255722120, 1497146310, 1770975435, 1730571449, 1558753269, 1760876296, 1952796120, 1215316880, 1831567213, 1114391653, 1689034993, 1679934467, 1992251607, 1104373232, 1053597476, 1285975797, 1245694082, 1043237894, 1144478033, 1366644361, 1720460595, 1922415173, 1518394287, 1255767760, 1679900344, 1992041370, 1164827663, 1306241617, 1114389707, 1841652336, 1073963146, 1457478703, 1164646774, 1629252549, 1093042012, 1659677615, 1740586700, 1659656015, 1972850105, 1093130924, 1770987752, 1568844678, 1194195008, 1902262587, 1295286979, 1144470022, 1720426620, 1700239373, 1598118168, 1689647372, 1114957123, 1790030385, 1669714606, 1619278363, 1700251253, 1629474150, 1457536161, 1831204759, 1932564184, 1316059405, 1316371263, 1396043923, 1942546890, 1285975797, 1477927754, 1356472914, 1376665505, 1972940666, 1821040890, 1295976876, 1487835484, 1730212390, 1992024665, 1356779250, 1528409026, 1861823197, 1861700353, 1033308697, 1033550546, 1639430515, 1073645180, 1306238647, 1790914042, 1902143886, 1629439427, 1427214303, 1508071374, 1740543214, 1336486083, 1487995205, 1083955892, 1396180006, 1518302223, 1043648876, 1740606425, 1568875169, 1841695566, 1831580828, 1689065625, 1891188546, 1982072260, 1336517614, 1740647221, 1699121962, 1376891416, 1629461116, 1336257179, 1164772844, 1962752642, 1508116286, 1518217298, 1881944569, 1912250234, 1982947677, 1992142152, 1134559396, 1619398187, 1083072649, 1962817601, 1588775621, 1205150240, 1295059236, 1053772152, 1235411547, 1235434036, 1881978021, 1720228067, 1710132816, 1851679252, 1952652281, 1255742243, 1063652220, 1952744468, 1306243571, 1184067936, 1013965797, 1356574131, 1780098020, 1225443641, 1669888186, 1972919488, 1982010534, 1225433857, 1194120691, 1558766865, 1891190039, 1376940866, 1326582529, 1851722417, 1407974579, 1396175170, 1316168321, 1568465466, 1982060935, 1598023830, 1528330180, 1023455672, 1528473899, 1629477021, 1497150585, 1992102909, 1457721177, 1972974756, 1841648649, 1265730170, 1720445067, 1831635226, 1962770016, 1669725933, 1629515952, 1164969499, 1770850224, 1760735021, 1205259611, 1093120057, 1548706997, 1073978193, 1396706693, 1407182587, 1811269517, 1033400320, 1780962647, 1619265352, 1871871731, 1891074985, 1255633459, 1972880813, 1104207612, 1609187905, 1982910055, 1427431055, 1164805545, 1891065520, 1689004095, 1902165467, 1043561020, 1457655474, 1306244348, 1538398326, 1154492700, 1629459474, 1366855017, 1639315666, 1588730360, 1992746879, 1306993696, 1285735605, 1730405820, 1972809275, 1366710170, 1740606276, 1609231737, 1942553821

TINs for retail clinics:

200580790, 203437352, 205996177, 364778738, 743019386, 203207688, 203348922, 203497312, 203497352, 203516039, 203516074, 203516114, 203555819, 203920184, 204231613, 204231679, 204269269, 204767711, 204768243, 204868967, 205096637, 205737038, 205737113, 205793559, 205818281, 208273162, 208550517, 208550806, 208550988, 208621296, 208672011, 260414169, 260844287, 260844323, 260892202, 261999831, 271306048, 300443813, 320417652, 352321781, 352465302, 352481214, 352484295, 364768982, 365768982, 371551105, 383893929, 383920362, 410215170, 411952112, 421731802, 453190926, 461499950, 462568224, 464644485, 464868413, 471622394, 471629750, 471808980, 473860141, 474302355, 611726627, 743019386, 743248448, 753006007, 900368980, 943435100, 411939629, 141193962, 203516155, 311186877, 320201197, 208525446, 320439205, 260892627, 320301560, 204343252, 233057155, 753172698, 203189187, 208578655, 320273811, 202738116, 208558546, 202209671, 120220967, 204236094, 260706444, 264053069, 320390705, 320387353, 176063966, 760639661, 120862119, 650624238, 810637771

NPIs for retail clinics:

1215066568, 1871652362, 1114333952, 1700013976, 1114167228, 1891110946, 1215112792, 1487728978, 1346293941, 1073566725, 1407033111, 1073566725, 1639573009, 1518193598, 1043446974, 1316127616, 1053589259, 1497198279, 1063693703, 1548526189, 1033424650, 1063693703, 1548526189, 1497198279, 1861757577, 1316374275, 1134417975, 1316102734, 1922541036, 1821365016, 1982954285, 1285979179, 1497194484, 1457792418, 1760810972,

1568855708, 1013958966, 1063644466, 1548202252, 1154548261, 1619303849, 1033309372,  
1104013879, 1568659233, 1164802021, 1629245311, 1073780730, 1306965611, 1720329923,  
1356485809, 1629005558, 1578891057, 1285975482, 1740661461, 1457470858, 1902848617,  
1407227945, 1124449533, 1477894673, 1053353615, 1740601012, 1699748608, 1699747303,  
1285765727, 1881738037, 1649511841, 1457323164, 1568751956, 1609076330, 1568856722,  
1417076829, 1346488798, 1346212065, 1346664216, 1194797894, 1447420815, 1932171634,  
1134191836, 1730266537, 1306231147, 1285882613, 1912103706, 1407177272, 1992993570,  
1023383981, 1003081068, 1184908436, 1043409964, 1730192022, 1770742926, 1467421685,  
1699963611, 1427233808, 1033379870, 1285601443, 1225006224, 1952379950, 1871561860,  
1770551772, 1902237035, 1235390568, 1457549677, 1467891572, 1922050384, 1992010201,  
1689865818, 1326039827, 1902095615, 1164628582, 1730241258, 1326261918, 1043597495,  
1740637321, 1336585314, 1316916539, 1558791384, 1821483132, 1740699271, 1225440076,  
1023425972, 1336556059, 1023448644, 1447648506, 1407282809, 1962770172, 1568878122,  
1487050589, 1093183113, 1023448644, 1386767036, 1194932087, 1528276342, 1962833368,  
1205291549, 1619926854, 1275782633, 1649420316, 1366670390, 1528376746, 1083922199,  
1417265521, 1962782938, 1558643916, 1477835858, 1669725941, 1881096584, 1700954211,  
1063530632, 1770780777, 1912104910, 1841508967, 1558679662, 1235594821, 1154723427,  
1407258775, 1942603477, 1841438348, 1043388705, 1700954302, 1033287651, 1639247158,  
1750459418, 1619045135, 1891863254, 1861560286, 1922176502, 1346318961, 1326116922,  
1144398603, 1831267293, 1245308600, 1710055173, 1124196670, 1669540126, 1225106685,  
1023186491, 1528107141, 1548309164, 1841339454, 1609915214, 1730228347, 1114067519,  
1700903317, 1194843748, 1235257833, 1497873723, 1801914130, 1538287875, 1780702035,  
1679691927, 1922125533, 1528185147, 1700904331, 1225156870, 1669590907, 1285752527,  
1609994953, 1194843714, 1932227030, 1588782601, 1417075565, 1023487535, 1639572761,  
1730582867, 1972906022, 1942603089, 1659774644, 1245633221, 1326441460, 1972906014,  
1346643392, 1962805762, 1841677465, 1356728984, 1528447539, 1053789768, 1942650395,  
1750731873, 1649672874, 1285036418, 1346642519, 1144622317, 1528460201, 1972905677,  
1982006680, 1467854190, 1770985400, 1811399546, 1720480452, 1316349046, 1003218736,  
1952791311, 1386021087, 1407233125, 1427435171, 1689051336, 1295112829, 1568849198,  
1063891075, 1326417825, 1215387311, 1487004503, 1790140903, 1730557430, 1336517044,  
1417325945, 1013372697, 1033512587, 1861895104, 1114320496, 1225431554, 1659774982,  
1750784088, 1235532482, 1316340565, 1770986929, 1831592062, 1588060974, 1588041107,  
1528445160, 1164809703, 1073990610, 1013066950, 1487826111, 1710150412, 1568635258,  
1639342322, 1720251457, 1275706970, 1477725182, 1356514038, 1053584748, 1497928188,  
1588837272, 1902079601, 1265605968, 1700059409, 1528231131, 1033382205, 1467629253,  
1780851568, 1285801068, 1669649448, 1447427232, 1639346109, 1801063375, 1871760447,  
1104093673, 1336316801, 1619144185, 1215104757, 1821265240, 1083881429, 1245407683,  
1033386453, 1598932923, 1902073349, 1043487481, 1588831929, 1790952075, 1518134808,  
1386811586, 1063689206, 1427225705, 1972770253, 1215132782, 1891003919, 1144538265,  
1952619074, 1346537198, 1164602090, 1972525012, 1386881944, 1225368350, 1336342963,  
1154769552, 1720384217, 1316253255, 1033426069, 1982802773, 1255603684, 1053789859,  
1629323266, 1114322310, 1144625344, 1689079881, 1205229978, 1548664667, 1477889079,  
1326311499, 1609820729, 1558588145, 1154724540, 1871989087, 1679955504, 1114477379,  
1801261359, 1295289015, 1578010583, 1629480298, 1205241759, 1114332665, 1922415165,  
1235546482, 1306253521, 1285041434, 1447667696, 1174930150, 1184031163, 1104227982,  
1265851018, 1801208426, 1275945891, 1508272444, 1326455577, 1841607082, 1619384690,  
1902274434, 1104994870, 1164590824, 1174641930, 1396813077, 1437347143, 1619095296,  
1659499788, 1700073723, 1780871145, 1861560377, 1912025529, 1881729481, 1972860781,  
1487848800, 1801185913, 1528161049, 1639272339, 1730120635, 1790942936, 1831292531,  
1205885035, 1104848860, 1164445466, 1336325752, 1427242569, 1457374753, 1700165594,  
1841212453, 1891717682, 1073530234, 1083631253, 1104843382, 1124047139, 1255755393,  
1285653295, 1295752343, 1316965155, 1417974676, 1417975251, 1497773261, 1528085792,  
1548287600, 1548287725, 1558388728, 1568485639, 1578580759, 1639196801, 1669499893,  
1720001993, 1720006521, 1740209758, 1750308870, 1750446860, 1760799712, 1811914971,  
1831116961, 1851318000, 1851715569, 1871510024, 1902823180, 1912924010, 1912924150,  
1932126117, 1992722169, 1558539650



TINs for telemedicine:

272790442, 320381801, 205009396, 461326978, 201394099, 465488266, 272245888, 461674195, 320356234

NPIs for telemedicine:

1114353927, 1770859266, 1245403567, 1629352182, 1568731503, 1033475090, 1942545694, 1033454780, 1528402492, 1699146456, 1730537028, 1184072472, 1992153274, 1649628934, 1538517800, 1356799621, 1275981565, 1194173484, 1306294509, 1285082560, 1720436009, 1730537093, 1760830814, 1215385299, 1851749832, 1154773125, 1073946224, 1437568656, 1457787160, 1992131601, 1851709273, 1477881506, 1043641905, 1588095442, 1114358066, 1568893428, 1053742916, 1518398460, 1902209497, 1871966531, 1992178115, 1295108777, 1063885549, 1598138554, 1689049777, 1861867954, 1942675038, 1184045999, 1346658614, 1851709133, 1174931448, 1689082950, 1609284975, 1972919512, 1669792990, 1093184244, 1811378987, 1518330539, 1235548546, 1306209366

**eAppendix B. ICD-9 and ICD-10 Codes for Conditions Treated in Urgent Care Centers and Retail Clinics**

| Condition <sup>a</sup> | ICD-9 code | ICD-10 code 1 | ICD-10 code 2 | ICD-10 code 3 | ICD-10 code 4 | ICD-10 code 5 | ICD-10 code 6 |
|------------------------|------------|---------------|---------------|---------------|---------------|---------------|---------------|
| Allergic rhinitis      | 4770       | J301          |               |               |               |               |               |
|                        | 4771       | J305          |               |               |               |               |               |
|                        | 4772       | J3081         |               |               |               |               |               |
|                        | 4778       | J302          | J3089         |               |               |               |               |
|                        | 4779       | J300          | J309          |               |               |               |               |
|                        |            |               |               |               |               |               |               |
| Bronchitis             | 4660       | J209          |               |               |               |               |               |
|                        | 4661       |               |               |               |               |               |               |
|                        | 46611      | J210          |               |               |               |               |               |
|                        | 46619      | J218          |               |               |               |               |               |
|                        | 490        | J40           |               |               |               |               |               |
|                        |            |               |               |               |               |               |               |
| Conjunctivitis         | 770        | A740          |               |               |               |               |               |
|                        | 771        | B300          |               |               |               |               |               |
|                        | 772        | B302          |               |               |               |               |               |
|                        | 773        | B301          |               |               |               |               |               |
|                        | 774        | B303          |               |               |               |               |               |
|                        | 778        | B308          |               |               |               |               |               |
|                        | 779        |               |               |               |               |               |               |
|                        | 7798       |               |               |               |               |               |               |
|                        | 7799       | B309          |               |               |               |               |               |
|                        | 1301       | B5809         |               |               |               |               |               |
|                        | 37040      | H16209        |               |               |               |               |               |
|                        | 37044      | H16299        |               |               |               |               |               |
|                        | 37200      | H1033         |               |               |               |               |               |
|                        | 37201      | H10239        |               |               |               |               |               |
|                        | 37202      | H10019        |               |               |               |               |               |
|                        | 37203      | H10029        |               |               |               |               |               |
|                        | 37204      | H10229        |               |               |               |               |               |
|                        | 37205      | H1013         |               |               |               |               |               |
|                        | 37206      | H10219        |               |               |               |               |               |
|                        | 37210      | H10409        |               |               |               |               |               |
|                        | 37211      | H10429        |               |               |               |               |               |
|                        | 37212      | H10439        |               |               |               |               |               |
|                        | 37213      | H1044         |               |               |               |               |               |
|                        | 37214      | H1045         |               |               |               |               |               |

|                     |       |        |  |  |  |  |  |
|---------------------|-------|--------|--|--|--|--|--|
|                     | 37215 |        |  |  |  |  |  |
|                     | 37220 | H10509 |  |  |  |  |  |
|                     | 37221 | H10529 |  |  |  |  |  |
|                     | 37222 | H10539 |  |  |  |  |  |
|                     | 37230 | H109   |  |  |  |  |  |
|                     | 37231 |        |  |  |  |  |  |
|                     | 37233 |        |  |  |  |  |  |
|                     | 37234 | H10819 |  |  |  |  |  |
|                     | 37239 | H1089  |  |  |  |  |  |
|                     |       |        |  |  |  |  |  |
| Other eye condition | 37240 | H11009 |  |  |  |  |  |
|                     | 37241 | H11049 |  |  |  |  |  |
|                     | 37242 | H11059 |  |  |  |  |  |
|                     | 37243 | H11029 |  |  |  |  |  |
|                     | 37244 | H11039 |  |  |  |  |  |
|                     | 37245 | H11069 |  |  |  |  |  |
|                     | 37250 | H1110  |  |  |  |  |  |
|                     | 37251 | H11159 |  |  |  |  |  |
|                     | 37252 | H11819 |  |  |  |  |  |
|                     | 37253 | H11149 |  |  |  |  |  |
|                     | 37254 | H11129 |  |  |  |  |  |
|                     | 37255 | H11139 |  |  |  |  |  |
|                     | 37256 | H11119 |  |  |  |  |  |
|                     | 37261 | H11229 |  |  |  |  |  |
|                     | 37262 | H11219 |  |  |  |  |  |
|                     | 37263 | H11239 |  |  |  |  |  |
|                     | 37264 | H11249 |  |  |  |  |  |
|                     | 37271 | H11439 |  |  |  |  |  |
|                     | 37272 | H1133  |  |  |  |  |  |
|                     | 37273 | H11429 |  |  |  |  |  |
|                     | 37274 | H11419 |  |  |  |  |  |
|                     | 37275 | H11449 |  |  |  |  |  |
|                     | 3728  |        |  |  |  |  |  |
|                     | 37281 | H11829 |  |  |  |  |  |
|                     | 37289 | H1189  |  |  |  |  |  |
|                     | 3729  | H119   |  |  |  |  |  |
|                     | 37300 | H01009 |  |  |  |  |  |
|                     | 37301 | H01019 |  |  |  |  |  |
|                     | 37302 | H01029 |  |  |  |  |  |
|                     | 37311 | H00019 |  |  |  |  |  |
|                     | 37312 | H00029 |  |  |  |  |  |

|  |       |        |  |  |  |  |  |
|--|-------|--------|--|--|--|--|--|
|  | 37313 | H00039 |  |  |  |  |  |
|  | 3732  | H0019  |  |  |  |  |  |
|  | 37331 | H01139 |  |  |  |  |  |
|  | 37332 | H01119 |  |  |  |  |  |
|  | 37333 | H01149 |  |  |  |  |  |
|  | 37334 | H01129 |  |  |  |  |  |
|  | 3734  |        |  |  |  |  |  |
|  | 3735  |        |  |  |  |  |  |
|  | 3736  |        |  |  |  |  |  |
|  | 3738  | H018   |  |  |  |  |  |
|  | 3739  | H019   |  |  |  |  |  |
|  | 37400 | H02009 |  |  |  |  |  |
|  | 37401 | H02039 |  |  |  |  |  |
|  | 37402 | H02029 |  |  |  |  |  |
|  | 37403 | H02049 |  |  |  |  |  |
|  | 37404 | H02019 |  |  |  |  |  |
|  | 37405 | H02059 |  |  |  |  |  |
|  | 37410 | H02109 |  |  |  |  |  |
|  | 37411 | H02139 |  |  |  |  |  |
|  | 37412 | H02129 |  |  |  |  |  |
|  | 37413 | H02149 |  |  |  |  |  |
|  | 37414 | H02119 |  |  |  |  |  |
|  | 37420 | H02209 |  |  |  |  |  |
|  | 37421 | H02239 |  |  |  |  |  |
|  | 37422 | H02229 |  |  |  |  |  |
|  | 37423 | H02219 |  |  |  |  |  |
|  | 37430 | H02409 |  |  |  |  |  |
|  | 37431 | H02439 |  |  |  |  |  |
|  | 37432 | H02429 |  |  |  |  |  |
|  | 37433 | H02419 |  |  |  |  |  |
|  | 37434 | H0236  |  |  |  |  |  |
|  | 37441 | H02539 |  |  |  |  |  |
|  | 37443 | H02519 |  |  |  |  |  |
|  | 37444 |        |  |  |  |  |  |
|  | 37445 | H0259  |  |  |  |  |  |
|  | 37446 | H02529 |  |  |  |  |  |
|  | 37450 | H0270  |  |  |  |  |  |
|  | 37451 | H0266  |  |  |  |  |  |
|  | 37452 | H02719 |  |  |  |  |  |
|  | 37453 | H02739 |  |  |  |  |  |
|  | 37454 | H02869 |  |  |  |  |  |

|                                            |       |        |        |        |        |        |  |
|--------------------------------------------|-------|--------|--------|--------|--------|--------|--|
|                                            | 37455 | H02729 |        |        |        |        |  |
|                                            | 37456 | H0279  |        |        |        |        |  |
|                                            | 37481 |        |        |        |        |        |  |
|                                            | 37482 | H02849 |        |        |        |        |  |
|                                            | 37483 | H02859 |        |        |        |        |  |
|                                            | 37484 | H02829 |        |        |        |        |  |
|                                            | 37485 | H02879 |        |        |        |        |  |
|                                            | 37486 | H02819 |        |        |        |        |  |
|                                            | 37487 | H02839 |        |        |        |        |  |
|                                            | 37489 | H0289  |        |        |        |        |  |
|                                            | 3749  | H029   |        |        |        |        |  |
|                                            |       |        |        |        |        |        |  |
| Influenza                                  | 4870  | J1100  | J129   |        |        |        |  |
|                                            | 4871  | J101   | J111   |        |        |        |  |
|                                            | 4878  | J112   | J1181  | J1189  |        |        |  |
|                                            | 488   |        |        |        |        |        |  |
|                                            | 4880  |        |        |        |        |        |  |
|                                            | 48801 |        |        |        |        |        |  |
|                                            | 48802 |        |        |        |        |        |  |
|                                            | 48809 |        |        |        |        |        |  |
|                                            | 4881  |        |        |        |        |        |  |
|                                            | 48811 | J1008  |        |        |        |        |  |
|                                            | 48812 |        |        |        |        |        |  |
|                                            | 48819 |        |        |        |        |        |  |
|                                            | 48881 | J09X1  |        |        |        |        |  |
|                                            | 48882 | J09X2  |        |        |        |        |  |
|                                            | 48889 | J09X3  | J09X9  |        |        |        |  |
|                                            |       |        |        |        |        |        |  |
| Otitis externa and impacted cerumen        | 38010 | H6000  | H6010  | H60319 | H60329 | H60399 |  |
|                                            | 38011 | H6193  |        |        |        |        |  |
|                                            | 38012 | H60339 |        |        |        |        |  |
|                                            | 38013 | H6240  |        |        |        |        |  |
|                                            | 38015 | H628X1 |        |        |        |        |  |
|                                            | 38016 |        |        |        |        |        |  |
|                                            | 38021 | H6040  |        |        |        |        |  |
|                                            | 38022 | H60509 | H60519 | H60529 | H60539 | H60549 |  |
|                                            | 38023 | H6060  | H608X1 | H6090  |        |        |  |
|                                            | 3804  | H6123  |        |        |        |        |  |
|                                            |       |        |        |        |        |        |  |
| Otitis media and eustachian tube diagnoses | 38100 | H65199 |        |        |        |        |  |

|               |       |        |       |  |  |  |  |
|---------------|-------|--------|-------|--|--|--|--|
|               | 38101 | H6500  |       |  |  |  |  |
|               | 38102 |        |       |  |  |  |  |
|               | 38103 |        |       |  |  |  |  |
|               | 38104 | H65119 |       |  |  |  |  |
|               | 38105 |        |       |  |  |  |  |
|               | 38106 |        |       |  |  |  |  |
|               | 38110 | H6520  |       |  |  |  |  |
|               | 38119 |        |       |  |  |  |  |
|               | 38120 | H6530  |       |  |  |  |  |
|               | 38129 |        |       |  |  |  |  |
|               | 3813  | H65499 |       |  |  |  |  |
|               | 3814  | H6590  |       |  |  |  |  |
|               | 38150 | H68009 |       |  |  |  |  |
|               | 38151 | H68019 |       |  |  |  |  |
|               | 38152 | H68029 |       |  |  |  |  |
|               | 38160 | H68109 |       |  |  |  |  |
|               | 38161 | H68119 |       |  |  |  |  |
|               | 38162 | H68129 |       |  |  |  |  |
|               | 38163 | H68139 |       |  |  |  |  |
|               | 3817  | H6900  |       |  |  |  |  |
|               | 38181 |        |       |  |  |  |  |
|               | 38189 | H6980  |       |  |  |  |  |
|               | 3819  | H6990  |       |  |  |  |  |
|               | 38200 | H66009 |       |  |  |  |  |
|               | 38201 | H66019 |       |  |  |  |  |
|               | 38202 | H679   |       |  |  |  |  |
|               | 3821  | H6613  |       |  |  |  |  |
|               | 3822  | H6623  |       |  |  |  |  |
|               | 3823  | H663X9 |       |  |  |  |  |
|               | 3824  | H6640  |       |  |  |  |  |
|               | 3829  | H6690  |       |  |  |  |  |
|               |       |        |       |  |  |  |  |
| Pharyngitis   | 340   | J020   | J0300 |  |  |  |  |
|               | 341   | A389   |       |  |  |  |  |
|               | 462   | J029   |       |  |  |  |  |
|               | 463   | J0390  |       |  |  |  |  |
|               | 7841  | R070   |       |  |  |  |  |
|               |       |        |       |  |  |  |  |
| URI/sinusitis | 460   | J00    |       |  |  |  |  |
|               | 4610  | J0100  |       |  |  |  |  |
|               | 4611  | J0110  |       |  |  |  |  |

|                 |       |       |       |       |  |  |  |
|-----------------|-------|-------|-------|-------|--|--|--|
|                 | 4612  | J0120 |       |       |  |  |  |
|                 | 4613  | J0130 |       |       |  |  |  |
|                 | 4618  | J0140 |       |       |  |  |  |
|                 | 4619  | J0190 |       |       |  |  |  |
|                 | 4640  |       |       |       |  |  |  |
|                 | 46400 | J040  |       |       |  |  |  |
|                 | 46410 | J0410 |       |       |  |  |  |
|                 | 46420 | J042  |       |       |  |  |  |
|                 | 4644  | J050  |       |       |  |  |  |
|                 | 4650  | J060  |       |       |  |  |  |
|                 | 4658  |       |       |       |  |  |  |
|                 | 4659  | J069  |       |       |  |  |  |
|                 | 4730  | J320  |       |       |  |  |  |
|                 | 4731  | J321  |       |       |  |  |  |
|                 | 4732  | J322  |       |       |  |  |  |
|                 | 4733  | J323  |       |       |  |  |  |
|                 | 4738  | J324  | J328  |       |  |  |  |
|                 | 4739  | J329  |       |       |  |  |  |
|                 | 4781  |       |       |       |  |  |  |
|                 | 47819 | J340  | J341  | J3489 |  |  |  |
|                 |       |       |       |       |  |  |  |
| UTI             | 5950  | N3000 | N3001 |       |  |  |  |
|                 | 5951  | N3010 | N3011 |       |  |  |  |
|                 | 5952  | N3020 | N3021 |       |  |  |  |
|                 | 5953  | N3030 | N3031 |       |  |  |  |
|                 | 5954  |       |       |       |  |  |  |
|                 | 59581 |       |       |       |  |  |  |
|                 | 59582 | N3040 | N3041 |       |  |  |  |
|                 | 59589 | N3080 | N3081 |       |  |  |  |
|                 | 5959  | N3090 | N3091 |       |  |  |  |
|                 | 5970  | N340  |       |       |  |  |  |
|                 | 59780 | N341  | N342  |       |  |  |  |
|                 | 59781 | N343  |       |       |  |  |  |
|                 | 59789 |       |       |       |  |  |  |
|                 | 5990  | N390  |       |       |  |  |  |
|                 | 7881  | R300  | R309  |       |  |  |  |
|                 |       |       |       |       |  |  |  |
| Viral infection | 790   | B970  |       |       |  |  |  |
|                 | 791   | B9712 |       |       |  |  |  |
|                 | 792   | B9711 |       |       |  |  |  |
|                 | 793   |       |       |       |  |  |  |

|                       |       |        |        |        |        |        |  |
|-----------------------|-------|--------|--------|--------|--------|--------|--|
|                       | 794   | B977   |        |        |        |        |  |
|                       | 7950  | B9730  |        |        |        |        |  |
|                       | 7951  | B9733  |        |        |        |        |  |
|                       | 7952  | B9734  |        |        |        |        |  |
|                       | 7953  | B9735  |        |        |        |        |  |
|                       | 7959  | B333   | B9739  |        |        |        |  |
|                       | 796   | B974   |        |        |        |        |  |
|                       | 798   |        |        |        |        |        |  |
|                       | 7981  | B334   |        |        |        |        |  |
|                       | 7982  | B9721  |        |        |        |        |  |
|                       | 7983  | B343   |        |        |        |        |  |
|                       | 7988  | A7489  |        |        |        |        |  |
|                       | 7989  | B338   | B341   | B342   | B344   | B348   |  |
|                       | 799   |        |        |        |        |        |  |
|                       | 7998  | A749   |        |        |        |        |  |
|                       | 7999  | B9789  |        |        |        |        |  |
|                       |       |        |        |        |        |        |  |
|                       |       |        |        |        |        |        |  |
| Cellulitis or abscess | 6800  | L0202  | L0203  |        |        |        |  |
|                       | 6801  | L0212  | L0213  |        |        |        |  |
|                       | 6802  | L02221 | L02222 | L02223 | L02224 | L02225 |  |
|                       | 6803  | L02429 |        |        |        |        |  |
|                       | 6804  | L02529 | L02539 |        |        |        |  |
|                       | 6805  | L0233  |        |        |        |        |  |
|                       | 6806  |        | L02439 |        |        |        |  |
|                       | 6807  | L02629 | L02639 |        |        |        |  |
|                       | 6808  | L02821 | L02828 | L02831 | L02838 |        |  |
|                       | 6809  | L0292  | L0293  |        |        |        |  |
|                       | 68100 | L03019 | L03029 |        |        |        |  |
|                       | 68101 |        |        |        |        |        |  |
|                       | 68102 |        |        |        |        |        |  |
|                       | 68110 | L03039 | L03049 |        |        |        |  |
|                       | 68111 |        |        |        |        |        |  |
|                       | 6819  |        |        |        |        |        |  |
|                       | 6820  | K122   | L03211 | L03212 |        |        |  |
|                       | 6821  | L03221 | L03222 |        |        |        |  |
|                       | 6822  | L03319 | L03329 |        |        |        |  |
|                       | 6823  | L03119 | L03129 |        |        |        |  |
|                       | 6824  |        |        |        |        |        |  |
|                       | 6825  | L03317 |        |        |        |        |  |
|                       | 6826  |        |        |        |        |        |  |



|           |       |             |         |         |        |  |  |
|-----------|-------|-------------|---------|---------|--------|--|--|
|           | 6827  |             |         |         |        |  |  |
|           | 6828  | L03811      | L03818  | L03891  | L03898 |  |  |
|           | 6829  | L0390       | L0391   |         |        |  |  |
|           | 683   | L049        |         |         |        |  |  |
|           | 684   | L0100       | L0103   |         |        |  |  |
|           | 6850  | L0501       | L0502   |         |        |  |  |
|           | 6851  | L0591       | L0592   |         |        |  |  |
|           | 6860  |             |         |         |        |  |  |
|           | 68600 | L080        |         |         |        |  |  |
|           | 68609 |             |         |         |        |  |  |
|           | 6861  | L980        |         |         |        |  |  |
|           | 6868  | E832        | L0889   |         |        |  |  |
|           | 6869  | L089        |         |         |        |  |  |
|           |       |             |         |         |        |  |  |
| Contusion | 920   | S0093XA     | S1093XA |         |        |  |  |
|           | 9210  |             |         |         |        |  |  |
|           | 9211  | S0010XA     |         |         |        |  |  |
|           | 9212  | S0510XA     |         |         |        |  |  |
|           | 9213  |             |         |         |        |  |  |
|           | 9219  | S0590XA     |         |         |        |  |  |
|           | 9220  | S2000XA     |         |         |        |  |  |
|           | 9221  | S20219A     |         |         |        |  |  |
|           | 9222  | S301XX<br>A |         |         |        |  |  |
|           | 9223  |             |         |         |        |  |  |
|           | 92231 | S300XX<br>A |         |         |        |  |  |
|           | 92232 |             |         |         |        |  |  |
|           | 92233 | S20229A     |         |         |        |  |  |
|           | 9224  | S30201A     | S30202A |         |        |  |  |
|           | 9228  | S303XX<br>A |         |         |        |  |  |
|           | 9229  | S2020XA     |         |         |        |  |  |
|           | 92300 | S40019A     |         |         |        |  |  |
|           | 92301 |             |         |         |        |  |  |
|           | 92302 |             |         |         |        |  |  |
|           | 92303 | S40029A     |         |         |        |  |  |
|           | 92309 |             |         |         |        |  |  |
|           | 92310 | S5010XA     |         |         |        |  |  |
|           | 92311 | S5000XA     |         |         |        |  |  |
|           | 92320 | S60229A     |         |         |        |  |  |
|           | 92321 | S60219A     |         |         |        |  |  |
|           | 9233  | S6000XA     | S60019A | S6010XA |        |  |  |

|        |       |         |         |         |  |  |  |
|--------|-------|---------|---------|---------|--|--|--|
|        | 9238  |         |         |         |  |  |  |
|        | 9239  |         |         |         |  |  |  |
|        | 92400 | S7010XA |         |         |  |  |  |
|        | 92401 | S7000XA |         |         |  |  |  |
|        | 92410 | S8010XA |         |         |  |  |  |
|        | 92411 | S8000XA |         |         |  |  |  |
|        | 92420 | S9030XA |         |         |  |  |  |
|        | 92421 | S9000XA |         |         |  |  |  |
|        | 9243  | S90119A | S90129A | S90229A |  |  |  |
|        | 9244  |         |         |         |  |  |  |
|        | 9245  |         |         |         |  |  |  |
|        | 9248  |         |         |         |  |  |  |
|        | 9249  |         |         |         |  |  |  |
|        |       |         |         |         |  |  |  |
| Dental | 5200  | K000    |         |         |  |  |  |
|        | 5201  | K001    |         |         |  |  |  |
|        | 5202  | K002    |         |         |  |  |  |
|        | 5203  | K003    |         |         |  |  |  |
|        | 5204  | K004    |         |         |  |  |  |
|        | 5205  | K005    |         |         |  |  |  |
|        | 5206  | K006    | K010    | K011    |  |  |  |
|        | 5207  | K007    |         |         |  |  |  |
|        | 5208  | K008    |         |         |  |  |  |
|        | 5209  | K009    |         |         |  |  |  |
|        | 5210  |         |         |         |  |  |  |
|        | 52100 | K029    |         |         |  |  |  |
|        | 52101 | K0261   |         |         |  |  |  |
|        | 52102 | K0262   |         |         |  |  |  |
|        | 52103 | K0263   |         |         |  |  |  |
|        | 52104 | K023    |         |         |  |  |  |
|        | 52105 |         |         |         |  |  |  |
|        | 52106 | K0251   |         |         |  |  |  |
|        | 52107 |         |         |         |  |  |  |
|        | 52108 | K027    |         |         |  |  |  |
|        | 52109 |         |         |         |  |  |  |
|        | 5211  |         |         |         |  |  |  |
|        | 52110 | K030    |         |         |  |  |  |
|        | 52111 |         |         |         |  |  |  |
|        | 52112 |         |         |         |  |  |  |
|        | 52113 |         |         |         |  |  |  |
|        | 52114 |         |         |         |  |  |  |

|  |       |       |       |  |  |  |  |
|--|-------|-------|-------|--|--|--|--|
|  | 52115 |       |       |  |  |  |  |
|  | 5212  |       |       |  |  |  |  |
|  | 52120 |       |       |  |  |  |  |
|  | 52121 | K031  |       |  |  |  |  |
|  | 52122 |       |       |  |  |  |  |
|  | 52123 |       |       |  |  |  |  |
|  | 52124 |       |       |  |  |  |  |
|  | 52125 |       |       |  |  |  |  |
|  | 5213  |       |       |  |  |  |  |
|  | 52130 |       |       |  |  |  |  |
|  | 52131 | K032  |       |  |  |  |  |
|  | 52132 |       |       |  |  |  |  |
|  | 52133 |       |       |  |  |  |  |
|  | 52134 |       |       |  |  |  |  |
|  | 52135 |       |       |  |  |  |  |
|  | 5214  |       |       |  |  |  |  |
|  | 52140 | K033  |       |  |  |  |  |
|  | 52141 |       |       |  |  |  |  |
|  | 52142 |       |       |  |  |  |  |
|  | 52149 |       |       |  |  |  |  |
|  | 5215  | K034  |       |  |  |  |  |
|  | 5216  | K035  |       |  |  |  |  |
|  | 5217  | K037  |       |  |  |  |  |
|  | 52181 | K0381 |       |  |  |  |  |
|  | 52189 | K0389 |       |  |  |  |  |
|  | 5219  | K039  |       |  |  |  |  |
|  | 5220  | K040  |       |  |  |  |  |
|  | 5221  | K041  |       |  |  |  |  |
|  | 5222  | K042  |       |  |  |  |  |
|  | 5223  | K043  |       |  |  |  |  |
|  | 5224  | K044  |       |  |  |  |  |
|  | 5225  | K047  |       |  |  |  |  |
|  | 5226  | K045  |       |  |  |  |  |
|  | 5227  | K046  |       |  |  |  |  |
|  | 5228  | K048  |       |  |  |  |  |
|  | 5229  | K0490 | K0499 |  |  |  |  |
|  | 5230  |       |       |  |  |  |  |
|  | 52300 | K0500 |       |  |  |  |  |
|  | 52301 | K0501 |       |  |  |  |  |
|  | 5231  |       |       |  |  |  |  |
|  | 52310 | K0510 |       |  |  |  |  |

|                    |       |             |             |      |  |  |  |
|--------------------|-------|-------------|-------------|------|--|--|--|
|                    | 52311 | K0511       |             |      |  |  |  |
|                    | 5232  |             |             |      |  |  |  |
|                    | 52320 | K060        |             |      |  |  |  |
|                    | 52321 |             |             |      |  |  |  |
|                    | 52322 |             |             |      |  |  |  |
|                    | 52323 |             |             |      |  |  |  |
|                    | 52324 |             |             |      |  |  |  |
|                    | 52325 |             |             |      |  |  |  |
|                    | 5233  |             |             |      |  |  |  |
|                    | 52330 | K0520       |             |      |  |  |  |
|                    | 52331 | K0521       |             |      |  |  |  |
|                    | 52332 | K0522       |             |      |  |  |  |
|                    | 52333 |             |             |      |  |  |  |
|                    | 5234  |             |             |      |  |  |  |
|                    | 52340 | K0530       |             |      |  |  |  |
|                    | 52341 | K0531       |             |      |  |  |  |
|                    | 52342 | K0532       |             |      |  |  |  |
|                    | 5235  | K054        |             |      |  |  |  |
|                    | 5236  | K036        |             |      |  |  |  |
|                    | 5238  | K055        | K061        | K062 |  |  |  |
|                    | 5239  | K056        |             |      |  |  |  |
|                    | 87363 | S025XX<br>A | S025XX<br>B |      |  |  |  |
|                    | 87373 |             |             |      |  |  |  |
|                    |       |             |             |      |  |  |  |
| Dislocation/sprain | 7361  | M20019      |             |      |  |  |  |
|                    | 83100 | S43006A     |             |      |  |  |  |
|                    | 83101 | S43016A     |             |      |  |  |  |
|                    | 83102 | S43026A     |             |      |  |  |  |
|                    | 83103 | S43036A     |             |      |  |  |  |
|                    | 83104 | S43109A     |             |      |  |  |  |
|                    | 83109 | S43086A     |             |      |  |  |  |
|                    | 83110 | S41009A     |             |      |  |  |  |
|                    | 83111 |             |             |      |  |  |  |
|                    | 83112 |             |             |      |  |  |  |
|                    | 83113 |             |             |      |  |  |  |
|                    | 83114 |             |             |      |  |  |  |
|                    | 83119 |             |             |      |  |  |  |
|                    | 83200 | S53006A     | S53106A     |      |  |  |  |
|                    | 83201 |             | S53116A     |      |  |  |  |
|                    | 83202 | S53026A     |             |      |  |  |  |
|                    | 83203 | S53136A     |             |      |  |  |  |

|  |       |         |         |         |         |  |  |
|--|-------|---------|---------|---------|---------|--|--|
|  | 83204 | S53146A |         |         |         |  |  |
|  | 83209 | S53096A | S53196A |         |         |  |  |
|  | 83210 |         |         |         |         |  |  |
|  | 83211 |         | S53016A |         |         |  |  |
|  | 83212 |         |         |         |         |  |  |
|  | 83213 |         |         |         |         |  |  |
|  | 83214 |         |         |         |         |  |  |
|  | 83219 |         |         |         |         |  |  |
|  | 8322  | S53033A |         |         |         |  |  |
|  | 83400 | S63106A | S63259A |         |         |  |  |
|  | 83401 | S63116A | S63269A |         |         |  |  |
|  | 83402 | S63126A | S63279A | S63289A | S63299A |  |  |
|  | 83410 |         |         |         |         |  |  |
|  | 83411 |         |         |         |         |  |  |
|  | 83412 | S61009A |         |         |         |  |  |
|  | 8360  | S83219A | S83249A |         |         |  |  |
|  | 8361  | S83289A |         |         |         |  |  |
|  | 8362  | S83209A | S8330XA |         |         |  |  |
|  | 8400  | S4350XA |         |         |         |  |  |
|  | 8401  | S4380XA |         |         |         |  |  |
|  | 8402  | S43419A |         |         |         |  |  |
|  | 8403  |         |         |         |         |  |  |
|  | 8404  | S43429A |         |         |         |  |  |
|  | 8405  |         |         |         |         |  |  |
|  | 8406  |         |         |         |         |  |  |
|  | 8407  | S43439A |         |         |         |  |  |
|  | 8408  | S43499A | S46019A | S46119A | S46819A |  |  |
|  | 8409  | S43409A | S46919A |         |         |  |  |
|  | 8410  | S53439A |         |         |         |  |  |
|  | 8411  | S53449A |         |         |         |  |  |
|  | 8412  | S53419A |         |         |         |  |  |
|  | 8413  | S53429A |         |         |         |  |  |
|  | 8418  | S53499A |         |         |         |  |  |
|  | 8419  | S53409A | S56919A |         |         |  |  |
|  | 84200 | S63509A | S66919A |         |         |  |  |
|  | 84201 | S63519A |         |         |         |  |  |
|  | 84202 | S63329A | S63529A |         |         |  |  |
|  | 84209 | S63599A |         |         |         |  |  |
|  | 84210 | S6390XA |         |         |         |  |  |
|  | 84211 | S638X9A |         |         |         |  |  |
|  | 84212 | S63649A | S63659A |         |         |  |  |

|  |       |             |             |  |  |  |  |
|--|-------|-------------|-------------|--|--|--|--|
|  | 84213 | S63629A     | S63639A     |  |  |  |  |
|  | 84219 |             |             |  |  |  |  |
|  | 8430  | S73119A     |             |  |  |  |  |
|  | 8431  | S73129A     |             |  |  |  |  |
|  | 8438  | S73199A     |             |  |  |  |  |
|  | 8439  | S73109A     | S76919A     |  |  |  |  |
|  | 8440  | S83429A     |             |  |  |  |  |
|  | 8441  | S83419A     |             |  |  |  |  |
|  | 8442  | S83509A     |             |  |  |  |  |
|  | 8443  | S8360XA     |             |  |  |  |  |
|  | 8448  | S838X9A     | S86819A     |  |  |  |  |
|  | 8449  | S8390XA     | S86919A     |  |  |  |  |
|  | 84500 | S93409A     |             |  |  |  |  |
|  | 84501 | S93429A     |             |  |  |  |  |
|  | 84502 | S93419A     |             |  |  |  |  |
|  | 84503 | S93439A     |             |  |  |  |  |
|  | 84509 | S86019A     | S93499A     |  |  |  |  |
|  | 84510 | S93609A     | S96919A     |  |  |  |  |
|  | 84511 | S93629A     |             |  |  |  |  |
|  | 84512 | S93529A     |             |  |  |  |  |
|  | 84513 | S93519A     |             |  |  |  |  |
|  | 84519 | S93699A     |             |  |  |  |  |
|  | 8460  | S338XX<br>A |             |  |  |  |  |
|  | 8461  | S336XX<br>A |             |  |  |  |  |
|  | 8462  |             |             |  |  |  |  |
|  | 8463  |             |             |  |  |  |  |
|  | 8468  |             |             |  |  |  |  |
|  | 8469  | S339XX<br>A |             |  |  |  |  |
|  | 8470  | S134XX<br>A | S138XX<br>A |  |  |  |  |
|  | 8471  | S233XX<br>A | S238XX<br>A |  |  |  |  |
|  | 8472  | S335XX<br>A |             |  |  |  |  |
|  | 8473  |             |             |  |  |  |  |
|  | 8474  |             |             |  |  |  |  |
|  | 8479  | S239XX<br>A |             |  |  |  |  |
|  | 8480  | S031XX<br>A |             |  |  |  |  |
|  | 8481  | S034XX<br>A |             |  |  |  |  |
|  | 8482  | S135XX      |             |  |  |  |  |

|          |       |             |         |         |         |  |  |
|----------|-------|-------------|---------|---------|---------|--|--|
|          |       | A           |         |         |         |  |  |
|          | 8483  | S2341XA     |         |         |         |  |  |
|          | 84840 | S23429A     |         |         |         |  |  |
|          | 84841 | S23420A     |         |         |         |  |  |
|          | 84842 | S23421A     |         |         |         |  |  |
|          | 84849 | S23428A     |         |         |         |  |  |
|          | 8485  |             |         |         |         |  |  |
|          | 8488  | S039XX<br>A | S29019A | S39011A |         |  |  |
|          | 8489  | T1490       |         |         |         |  |  |
|          |       |             |         |         |         |  |  |
| Fracture | 8020  | S022XX<br>A |         |         |         |  |  |
|          | 80700 |             |         |         |         |  |  |
|          | 80701 | S2239XA     |         |         |         |  |  |
|          | 80702 |             |         |         |         |  |  |
|          | 80703 |             |         |         |         |  |  |
|          | 80704 |             |         |         |         |  |  |
|          | 80705 |             |         |         |         |  |  |
|          | 80706 |             |         |         |         |  |  |
|          | 80707 |             |         |         |         |  |  |
|          | 80708 |             |         |         |         |  |  |
|          | 80709 | S2249XA     |         |         |         |  |  |
|          | 8072  | S2220XA     |         |         |         |  |  |
|          | 8080  | S32409A     |         |         |         |  |  |
|          | 8082  | S32501A     | S32502A | S32509A |         |  |  |
|          | 80841 | S32309A     |         |         |         |  |  |
|          | 80842 | S32609A     |         |         |         |  |  |
|          | 80849 | S3289XA     |         |         |         |  |  |
|          | 8088  | S329XX<br>A |         |         |         |  |  |
|          | 8090  | S229XX<br>A |         |         |         |  |  |
|          | 81000 | S42009A     |         |         |         |  |  |
|          | 81001 | S42013A     | S42016A | S42019A |         |  |  |
|          | 81002 | S42023A     | S42026A |         |         |  |  |
|          | 81003 | S42033A     | S42036A |         |         |  |  |
|          | 81100 | S42109A     |         |         |         |  |  |
|          | 81101 | S42123A     | S42126A |         |         |  |  |
|          | 81102 | S42133A     | S42136A |         |         |  |  |
|          | 81103 | S42143A     | S42146A | S42153A | S42156A |  |  |
|          | 81109 | S42113A     | S42116A | S42199A |         |  |  |
|          | 81200 | S42209A     |         |         |         |  |  |

|  |       |         |         |         |         |         |  |
|--|-------|---------|---------|---------|---------|---------|--|
|  | 81201 | S42213A | S42216A |         |         |         |  |
|  | 81202 |         | S42295A |         |         |         |  |
|  | 81203 | S42253A | S42256A |         |         |         |  |
|  | 81209 | S42293A | S42296A |         |         |         |  |
|  | 81220 | S42309A |         |         |         |         |  |
|  | 81221 | S42399A |         |         |         |         |  |
|  | 81230 | S42309B |         |         |         |         |  |
|  | 81231 | S42399B |         |         |         |         |  |
|  | 81240 | S42409A |         |         |         |         |  |
|  | 81241 | S42413A | S42416A |         |         |         |  |
|  | 81242 | S42433A | S42436A | S42453A | S42456A |         |  |
|  | 81243 | S42443A | S42446A | S42463A | S42466A |         |  |
|  | 81244 | S42473A | S42476A |         |         |         |  |
|  | 81249 | S42493A | S42496A |         |         |         |  |
|  | 81300 |         |         |         |         |         |  |
|  | 81301 | S52023A | S52026A |         |         |         |  |
|  | 81302 | S52043A | S52046A |         |         |         |  |
|  | 81303 | S52279A |         |         |         |         |  |
|  | 81304 | S52009A | S52099A |         |         |         |  |
|  | 81305 | S52123A | S52126A |         |         |         |  |
|  | 81306 | S52133A | S52136A |         |         |         |  |
|  | 81307 | S52109A | S52189A | S59109A |         |         |  |
|  | 81308 |         |         |         |         |         |  |
|  | 81320 |         |         |         |         |         |  |
|  | 81321 | S52309A |         |         |         |         |  |
|  | 81322 | S52209A |         |         |         |         |  |
|  | 81323 |         |         |         |         |         |  |
|  | 81340 |         |         |         |         |         |  |
|  | 81341 | S52539A |         |         |         |         |  |
|  | 81342 | S52509A |         |         |         |         |  |
|  | 81343 | S52609A |         |         |         |         |  |
|  | 81344 |         |         |         |         |         |  |
|  | 81345 | S52119A | S52529A |         |         |         |  |
|  | 81346 | S52019A | S52629A |         |         |         |  |
|  | 81347 | S52011A | S52012A | S52111A | S52112A | S52521A |  |
|  | 81380 | S5290XA |         |         |         |         |  |
|  | 81381 |         |         |         |         |         |  |
|  | 81382 |         |         |         |         |         |  |
|  | 81383 |         |         |         |         |         |  |
|  | 81400 | S62109A |         |         |         |         |  |
|  | 81401 | S62009A |         |         |         |         |  |



|  |       |         |         |         |         |         |  |
|--|-------|---------|---------|---------|---------|---------|--|
|  | 81402 | S62123A | S62126A |         |         |         |  |
|  | 81403 | S62113A | S62116A |         |         |         |  |
|  | 81404 | S62163A | S62166A |         |         |         |  |
|  | 81405 | S62173A | S62176A |         |         |         |  |
|  | 81406 | S62183A | S62186A |         |         |         |  |
|  | 81407 | S62133A | S62136A |         |         |         |  |
|  | 81408 | S62143A | S62146A |         |         |         |  |
|  | 81409 | S62153A | S62156A |         |         |         |  |
|  | 81500 | S62309A |         |         |         |         |  |
|  | 81501 | S62233A | S62236A |         |         |         |  |
|  | 81502 | S62319A | S62349A |         |         |         |  |
|  | 81503 | S62329A | S62359A |         |         |         |  |
|  | 81504 | S62339A | S62369A |         |         |         |  |
|  | 81509 | S62399A |         |         |         |         |  |
|  | 81600 | S62509A | S62609A |         |         |         |  |
|  | 81601 | S62513A | S62516A | S62629A | S62649A | S62659A |  |
|  | 81602 | S62523A | S62526A | S62639A | S62669A |         |  |
|  | 81603 |         |         |         |         |         |  |
|  | 8170  |         |         |         |         |         |  |
|  | 8180  | S6290XA |         |         |         |         |  |
|  | 8190  |         |         | S4290XA | S4291XA | S4292XA |  |
|  | 8220  | S82009A |         |         |         |         |  |
|  | 82300 | S82109A |         |         |         |         |  |
|  | 82301 | S82839A |         |         |         |         |  |
|  | 82302 | S82101A | S82102A | S82831A | S82832A |         |  |
|  | 82320 | S82209A |         |         |         |         |  |
|  | 82321 | S82409A |         |         |         |         |  |
|  | 82322 |         | S82202A |         | S82402A |         |  |
|  | 82340 | S82169A | S82319A |         |         |         |  |
|  | 82341 | S82819A | S82829A |         |         |         |  |
|  | 82342 | S82161A | S82162A | S82311A | S82312A | S82811A |  |
|  | 82380 | S82201A |         |         |         |         |  |
|  | 82381 | S82401A |         |         |         |         |  |
|  | 82382 |         |         |         |         |         |  |
|  | 8240  | S8253XA | S8256XA |         |         |         |  |
|  | 8242  | S8263XA | S8266XA |         |         |         |  |
|  | 8244  | S82843A | S82846A |         |         |         |  |
|  | 8246  | S82853A | S82856A |         |         |         |  |
|  | 8248  | S82899A |         |         |         |         |  |
|  | 8250  | S92009A |         |         |         |         |  |
|  | 82520 | S92909A |         |         |         |         |  |

|                                             |       |         |         |         |         |         |         |
|---------------------------------------------|-------|---------|---------|---------|---------|---------|---------|
|                                             | 82521 | S92109A |         |         |         |         |         |
|                                             | 82522 | S92253A | S92256A |         |         |         |         |
|                                             | 82523 | S92213A | S92216A |         |         |         |         |
|                                             | 82524 | S92223A | S92226A | S92233A | S92236A | S92243A | S92246A |
|                                             | 82525 | S92309A |         |         |         |         |         |
|                                             | 82529 | S92209A |         |         |         |         |         |
|                                             | 8260  | S92403A | S92406A | S92503A | S92506A |         |         |
|                                             |       |         |         |         |         |         |         |
| Joint and muscle pain, tendonitis, bursitis | 71530 | M1990   |         |         |         |         |         |
|                                             | 71531 |         |         |         |         |         |         |
|                                             | 71532 |         |         |         |         |         |         |
|                                             | 71533 |         |         |         |         |         |         |
|                                             | 71534 | M189    |         |         |         |         |         |
|                                             | 71535 | M169    |         |         |         |         |         |
|                                             | 71536 | M179    |         |         |         |         |         |
|                                             | 71537 |         |         |         |         |         |         |
|                                             | 71538 |         |         |         |         |         |         |
|                                             | 71590 | M159    |         |         |         |         |         |
|                                             | 71591 |         |         |         |         |         |         |
|                                             | 71592 |         |         |         |         |         |         |
|                                             | 71593 |         |         |         |         |         |         |
|                                             | 71594 |         |         |         |         |         |         |
|                                             | 71595 |         |         |         |         |         |         |
|                                             | 71596 |         |         |         |         |         |         |
|                                             | 71597 |         |         |         |         |         |         |
|                                             | 71598 |         |         |         |         |         |         |
|                                             | 71940 | M2550   |         |         |         |         |         |
|                                             | 71941 | M25519  |         |         |         |         |         |
|                                             | 71942 | M25529  |         |         |         |         |         |
|                                             | 71943 | M25539  |         |         |         |         |         |
|                                             | 71944 | M79643  | M79646  |         |         |         |         |
|                                             | 71945 | M25559  |         |         |         |         |         |
|                                             | 71946 | M25569  |         |         |         |         |         |
|                                             | 71947 | M25579  |         |         |         |         |         |
|                                             | 71948 |         |         |         |         |         |         |
|                                             | 71949 |         |         |         |         |         |         |
|                                             | 7260  | M7500   |         |         |         |         |         |
|                                             | 72610 | M75100  | M7550   |         |         |         |         |
|                                             | 72611 | M7530   |         |         |         |         |         |
|                                             | 72612 | M7520   |         |         |         |         |         |

|  |       |        |        |        |        |        |  |
|--|-------|--------|--------|--------|--------|--------|--|
|  | 72613 | M75110 |        |        |        |        |  |
|  | 72619 |        |        |        |        |        |  |
|  | 7262  |        | M7540  | M7580  |        |        |  |
|  | 72630 | M25729 |        |        |        |        |  |
|  | 72631 | M7700  |        |        |        |        |  |
|  | 72632 | M7710  |        |        |        |        |  |
|  | 72633 | M7020  |        |        |        |        |  |
|  | 72639 |        |        |        |        |        |  |
|  | 7264  | M7010  | M7720  |        |        |        |  |
|  | 7265  | M7060  | M7070  | M7610  | M7620  |        |  |
|  | 72660 | M7050  |        |        |        |        |  |
|  | 72661 | M76899 |        |        |        |        |  |
|  | 72662 | M7640  |        |        |        |        |  |
|  | 72663 |        |        |        |        |        |  |
|  | 72664 | M7650  |        |        |        |        |  |
|  | 72665 | M7040  |        |        |        |        |  |
|  | 72669 |        |        |        |        |        |  |
|  | 72670 |        | M7740  |        |        |        |  |
|  | 72671 | M7660  |        |        |        |        |  |
|  | 72672 | M76829 |        |        |        |        |  |
|  | 72673 | M7730  |        |        |        |        |  |
|  | 72679 | M7750  |        |        |        |        |  |
|  | 7268  | M778   |        |        |        |        |  |
|  | 72690 | M779   |        |        |        |        |  |
|  | 72691 | M2570  |        |        |        |        |  |
|  | 72700 | M659   |        |        |        |        |  |
|  | 72701 |        |        |        |        |        |  |
|  | 72702 | D481   |        |        |        |        |  |
|  | 72703 | M6530  |        |        |        |        |  |
|  | 72704 | M654   |        |        |        |        |  |
|  | 72705 | M65849 |        |        |        |        |  |
|  | 72706 | M65879 |        |        |        |        |  |
|  | 72709 | M6580  |        |        |        |        |  |
|  | 7271  | M2010  |        |        |        |        |  |
|  | 7272  | M70039 | M7030  |        |        |        |  |
|  | 7273  | M7150  |        |        |        |        |  |
|  | 72740 |        |        |        |        |        |  |
|  | 72741 | M67419 | M67429 | M67439 | M67449 | M67459 |  |
|  | 72742 |        |        |        |        |        |  |
|  | 72743 | M6740  |        |        |        |        |  |
|  | 72749 | M7130  |        |        |        |        |  |

|            |       |         |         |         |         |       |  |
|------------|-------|---------|---------|---------|---------|-------|--|
|            | 72750 | M6610   |         |         |         |       |  |
|            | 72751 | M7120   |         |         |         |       |  |
|            | 72759 | M6618   |         |         |         |       |  |
|            | 72760 | M669    |         |         |         |       |  |
|            | 72761 | M75120  |         |         |         |       |  |
|            | 72762 | M66829  |         |         |         |       |  |
|            | 72763 | M66239  | M66249  |         |         |       |  |
|            | 72764 | M66339  | M66349  |         |         |       |  |
|            | 72765 | M66259  |         |         |         |       |  |
|            | 72766 | M66269  |         |         |         |       |  |
|            | 72767 | M66369  |         |         |         |       |  |
|            | 72768 | M66879  |         |         |         |       |  |
|            | 72769 | M6688   |         |         |         |       |  |
|            | 72781 | M6700   |         |         |         |       |  |
|            | 7279  | M6790   | M719    |         |         |       |  |
|            | 72782 | M6520   | M7140   |         |         |       |  |
|            | 72783 | M6750   |         |         |         |       |  |
|            | 72789 | M6500   | M6780   | M6788   | M7100   | M7180 |  |
|            | 72882 | M6020   |         |         |         |       |  |
|            | 72885 | M6240   | M62838  |         |         |       |  |
|            | 7291  | M609    | M791    | M797    |         |       |  |
|            | 7292  | M5410   | M792    |         |         |       |  |
|            |       |         |         |         |         |       |  |
| Laceration | 8730  | S0100XA |         |         |         |       |  |
|            | 87320 | S0120XA | S0121XA | S0123XA | S0125XA |       |  |
|            | 87329 | S08811A |         |         |         |       |  |
|            | 87340 | S0993XA |         |         |         |       |  |
|            | 87341 | S01409A |         |         |         |       |  |
|            | 87342 |         |         |         |         |       |  |
|            | 87343 | S01501A |         |         |         |       |  |
|            | 87344 |         |         |         |         |       |  |
|            | 87349 | S0180XA |         |         |         |       |  |
|            | 87360 | S01502A |         |         |         |       |  |
|            | 87361 |         |         |         |         |       |  |
|            | 87362 |         |         |         |         |       |  |
|            | 87364 |         |         |         |         |       |  |
|            | 87365 |         |         |         |         |       |  |
|            | 87369 | S01512A |         |         |         |       |  |
|            | 8738  | S0190XA | S0990XA |         |         |       |  |
|            | 8760  | S21209A | S31000A |         |         |       |  |
|            | 8770  | S31809A |         |         |         |       |  |

|                       |       |         |         |         |  |  |  |
|-----------------------|-------|---------|---------|---------|--|--|--|
|                       | 8792  | S31102A | S31105A |         |  |  |  |
|                       | 8794  | S31109A |         |         |  |  |  |
|                       | 8796  |         |         |         |  |  |  |
|                       | 8798  |         |         |         |  |  |  |
|                       | 88003 | S41109A |         |         |  |  |  |
|                       | 88100 | S51809A |         |         |  |  |  |
|                       | 88101 | S51009A |         |         |  |  |  |
|                       | 88102 | S61509A |         |         |  |  |  |
|                       | 8820  | S61409A |         |         |  |  |  |
|                       | 8830  | S61209A |         |         |  |  |  |
|                       | 8900  | S71009A | S71109A |         |  |  |  |
|                       | 8910  | S81009A | S81809A | S91009A |  |  |  |
|                       | 8920  | S91309A |         |         |  |  |  |
|                       | 8930  | S91109A |         |         |  |  |  |
|                       | 8940  |         |         |         |  |  |  |
|                       |       |         |         |         |  |  |  |
| Other urinary problem | 5991  | N360    |         |         |  |  |  |
|                       | 5992  | N361    |         |         |  |  |  |
|                       | 5993  | N362    |         |         |  |  |  |
|                       | 5994  | N365    |         |         |  |  |  |
|                       | 5995  |         |         |         |  |  |  |
|                       | 5996  |         |         |         |  |  |  |
|                       | 59960 | N139    |         |         |  |  |  |
|                       | 59969 |         |         |         |  |  |  |
|                       | 5997  |         |         |         |  |  |  |
|                       | 59970 | R319    |         |         |  |  |  |
|                       | 59971 | R310    |         |         |  |  |  |
|                       | 59972 | R311    | R312    |         |  |  |  |
|                       | 5998  |         |         |         |  |  |  |
|                       | 59981 | N3641   |         |         |  |  |  |
|                       | 59982 | N3642   |         |         |  |  |  |
|                       | 59983 |         |         |         |  |  |  |
|                       | 59984 | N368    |         |         |  |  |  |
|                       | 59989 | N398    |         |         |  |  |  |
|                       | 5999  | N369    | N399    |         |  |  |  |

<sup>a</sup>In some cases, crosswalk from ICD-9 resulted in multiple ICD-10 codes
